1 **Allosteric cooperation in  $\beta$ -lactam binding to a non-classical transpeptidase**

2

3 Nazia Ahmad<sup>1</sup>, Sangita Kachhap<sup>2</sup>, Varsha Chauhan<sup>3</sup>, Kunal Sharma<sup>1</sup>, Pallavi Juneja<sup>1</sup>, C.  
4 Korin Bullen<sup>3</sup>, Tomasz Borowski<sup>2</sup>, William R. Bishai<sup>3</sup>, Gyanu Lamichhane<sup>3,\*</sup>, Pankaj Kumar<sup>1,3,\*</sup>

5

6

7 **Affiliations:**

8 <sup>1</sup>Department of Biochemistry, School of Chemical and Life Sciences, Jamia Hamdard  
9 University, New Delhi 110062, India

10 <sup>2</sup>Jerzy Haber Institute of Catalysis and Surface Chemistry, Polish Academy of Sciences,  
11 Niezapominajek 8, PL-30239 Krakow, Poland

12 <sup>3</sup>Department of Infectious Diseases, Centre for Tuberculosis Research, Johns Hopkins  
13 University, Baltimore, MD 21231, USA

14

15 **\*Correspondence:**

16 Pankaj Kumar, Email: [pkumar10@jhmi.edu](mailto:pkumar10@jhmi.edu)

17 Gyanu Lamichhane, Email: [gyanu@jhu.edu](mailto:gyanu@jhu.edu)

18

19 **Keywords:** Peptidoglycan, L,D-transpeptidase,  $\beta$ -lactams, *Mycobacterium tuberculosis*

20

21

22

23

24

25

26

27

28

29

30

31

32

33

34

35

36 **ABSTRACT**

37 *Mycobacterium tuberculosis* peptidoglycan (PG) is atypical as its synthesis involves a new  
38 enzyme class, L,D-transpeptidases. Prior studies of L,D-transpeptidases have identified only  
39 the catalytic site that binds to peptide moiety of the PG substrate or  $\beta$ -lactam antibiotics. This  
40 insight was leveraged to develop mechanism of its activity and inhibition by  $\beta$ -lactams. Here  
41 we report identification of an allosteric site at a distance of 21 Å from the catalytic site that  
42 binds the sugar moiety of PG substrates (hereafter referred to as the S-pocket). This site  
43 also binds a second  $\beta$ -lactam molecule and influences binding at the catalytic site. We  
44 provide evidence that two  $\beta$ -lactam molecules bind co-operatively to this enzyme, one non-  
45 covalently at the S-site and one covalently at the catalytic site. This dual  $\beta$ -lactam binding  
46 phenomenon is previously unknown and is an observation that may offer novel approaches  
47 for the structure-based design of new  $\beta$ -lactam antibiotics for *M. tuberculosis*.

48

49

50

51

52

53

54

55

56

57

58

59

60

61

62

63

64

65

66

67

68

69

## 70 INTRODUCTION

71 Tuberculosis (TB), is a major threat to global health as it claims more human lives  
72 than any other bacterial infection (Chakaya et al., 2021). The emergence of multi-(MDR) and  
73 extensively drug-resistant (XDR) strains of *Mycobacterium tuberculosis* (*M.tb*), the bacterium  
74 that causes TB, has further limited our capability to fight the disease. One major factor  
75 contributing to the emergence of drug-resistant TB is poor compliance to prolonged  
76 treatment regimens. While combinatorial drug therapy kills the majority of *M.tb* bacilli a subset  
77 of the bacterial population, defined as “persisters”, tolerate TB drugs. This persister subset  
78 requires prolonged treatment for sterilization to occur (Gideon and Flynn, 2011; Lillebaek et  
79 al., 2002; Peddireddy et al., 2017; Wayne and Hayes, 1996). Mechanisms of persistence in  
80 *M.tb* are likely multifactorial, involving cell wall peptidoglycan remodelling, transporters or  
81 efflux pumps, and alternative energy sources (Keren et al., 2011; Zhang et al., 2012).  
82 Molecular understanding of these pathways may facilitate discovery of new therapeutics to  
83 overcome the current challenges posed by *M.tb* persistence and drug-resistance.

84 Peptidoglycan (PG) is an essential component of the bacterial cell wall and  
85 constitutes the exoskeleton of bacterial cells. PG consist of long glycan chains composed of  
86 two different sugars N-acetyl muramic acid (NAM) and N-acetyl glucose amine (NAG) that  
87 are crossed linked via short stem peptide chains. The PG composition of *M.tb* in slowly-  
88 replicating states is likely to be distinct from the one during active growth (Gupta et al., 2010;  
89 Schoonmaker et al., 2014; Wietzerbin et al., 1974). In particular, a high percentage of peptide  
90 cross-links in *M.tb* join the third amino acids (3-3 linkages) of the adjacent stem peptides  
91 instead of the classical 4-3 linkages, and these linkages are formed by transpeptidases  
92 (Tolufashe et al., 2020). The 4-3 linkages, which were historically considered to predominate  
93 throughout bacterial growth and senescence, are generated by a well-known enzyme class,  
94 namely the D,D-transpeptidases (also known as penicillin-binding proteins) (Tolufashe et al.,  
95 2020). The 3-3 linkages are generated by the more recently discovered enzyme class, the  
96 L,D-transpeptidases (Mainardi et al., 2005).

97 Among the five L,D-transpeptidase paralogs of *M.tb*, Ldt<sub>M12</sub> plays an important role  
98 since an *M.tb* strain lacking the gene encoding this enzyme exhibits attenuation of  
99 persistence and virulence (Bianchet et al., 2017; Brammer Basta et al., 2015; Dubee et al.,  
100 2012; Gupta et al., 2010; Libreros-Zuniga et al., 2019; Sanders et al., 2014; Schoonmaker et  
101 al., 2014). Additional reports have demonstrated altered and attenuated cellular physiology  
102 of *M.tb* in association with the loss of function of Ldt<sub>M11</sub> (Schoonmaker et al., 2014) and  
103 Ldt<sub>M15</sub> (Brammer Basta et al., 2015). The necessity of L,D-transpeptidases for virulence has

104 suggested that they may comprise valuable drug targets, and indeed these enzymes are  
105 inhibited by the carbapenem class of  $\beta$ -lactam drugs (Mainardi et al., 2005). Recent work  
106 further suggests the efficacy of these carbapenems against both dividing and non-dividing  
107 mycobacteria (Hugonnet et al., 2009). To further evaluate the druggability of the L,D-  
108 transpeptidases class, several independent groups have described the crystal structures of  
109 this enzyme class bound to carbapenems such as meropenem, tebipenem, biapenem and  
110 faropenem (Bianchet et al., 2017; Erdemli et al., 2012; Kim et al., 2013; Li et al., 2013; Steiner  
111 et al., 2017). The biochemical mechanisms and kinetics of inhibition of L,D-transpeptidases  
112 by  $\beta$ -lactams have been documented (Cordillot et al., 2013), and new experimental  $\beta$ -lactams  
113 that target *M.tb* L,D-transpeptidases have recently been described (Bianchet et al., 2017;  
114 Kumar et al., 2017; Martelli et al., 2021).

115 The L,D-transpeptidase class in *M.tb* are comprised of at least four substructural  
116 domains including two immunoglobulin-like domains (IgD1 & IgD2), a YkuD domain, and a  
117 C-terminal subdomain (CTSD). The YkuD domain is known to play a role in catalytic function  
118 and  $\beta$ -lactam binding (Erdemli et al., 2012), while the roles of the other domains remains less  
119 certain. The YkuD domain has a highly conserved motif HXX14-17[S/T]HGChN containing  
120 three residues analogous to the catalytic triad of cysteine proteases: a cysteine, a histidine  
121 and a third residue (Cystine 354, Histidine 336 and Serine 337 in Ldt<sub>M2</sub>) to catalyse the  
122 transpeptidation reaction (Erdemli et al., 2012). This catalytic triad residues resides under a  
123 flap formed by a long loop. The flap can open and close to create two cavities (the inner and  
124 outer cavities), around a cysteine residue, that are connected by a narrow tunnel (Fakhar et  
125 al., 2017). It is proposed that these cavities are binding sites for the acyl acceptor and acyl  
126 donor tetrapeptide stems (L-Alanyl-D-Glutamyl-*meso*-diaminopimelyl-D-alanine) with the  
127 donor tetrapeptide binding to the outer cavity and the acceptor tetrapeptide to the inner cavity  
128 (Erdemli et al., 2012). As the  $\beta$ -lactam class of drugs mimics the tetrapeptide stems of PG,  
129 several of the carbapenems drugs have been found to bind both the inner and outer cavities  
130 to form covalent linkage with catalytic cysteine residue of the L,D-transpeptidase (Bianchet  
131 et al., 2017; Kim et al., 2013; Kumar et al., 2017).

132 Despite the significance of L,D-transpeptidases in *M.tb* cell physiology and TB  
133 disease, the structural and molecular details of how different chemical groups of the nascent  
134 PG structure interact with this enzyme class are not sufficiently understood. The  
135 disaccharide-tetrapeptide *N*-acetylglucosamine-*N*-acetylmuramic acid-L-Alanyl-D-Glutamyl-  
136 *meso*-diaminopimelyl-D-alanine is the substrate for L,D-transpeptidases (Cordillot et al.,  
137 2013; Lavollay et al., 2008) while the D,D-transpeptidases use the disaccharide-pentapeptide

138 *N*-acetylglucosamine-*N*-acetylmuramic acid-L-Alanyl-D-Glutamyl-*meso*-diaminopimelyl-D-  
139 alanyl-D-alanine as their substrate (Tolufashe et al., 2020). Interactions between the peptide  
140 subunits of these nascent PG substrates with their relevant enzymes have been described  
141 (Cordillot et al., 2013; Erdemli et al., 2012; Fakhar et al., 2017; Lavollay et al., 2008; Mainardi  
142 et al., 2005), and it is generally assumed that the disaccharide component of the subunit  
143 interacts only with transglycosylases (Fibriansah et al., 2012; Mavrici et al., 2014) and thus  
144 are not relevant to the transpeptidases. However, evidence challenging this model is  
145 growing. Recent studies with the *Bacillus subtilis* L,D-transpeptidase Ldt<sub>Bs</sub> have suggested  
146 binding of the disaccharide component through a PG recognition domain, LysM, within Ldt<sub>Bs</sub>  
147 (Schanda et al., 2014). However, the mechanism of PG recognition may be different in *M.tb*  
148 since this LysM domain is absent in its L,D-transpeptidases.

149 In the current study, we investigate the interaction of PG substrate and Ldt<sub>Mt2</sub>. Using  
150 several interdisciplinary approaches, we have identified a new pocket in the Ldt<sub>Mt2</sub> enzyme  
151 that binds PG saccharide moiety. We further elucidate the role of this pocket in recognition  
152 of  $\beta$ -lactams in cooperativity with the catalytic site. These observations not only explain the  
153 mechanism for manifestation of physiological activity of Ldt<sub>Mt2</sub>, but also give insights into  
154 inhibition by  $\beta$ -lactams that provide the context for structure-based design of anti-tubercular  
155 drugs.

156

157

## 158 **RESULTS**

159

### 160 **A pocket remote from the catalytic site of Ldt<sub>Mt2</sub> binds to peptidoglycan**

161 The crystal structure of Ldt<sub>Mt2</sub> was solved at 1.57Å resolution (**Table 1**). An electron  
162 density was observed in a pocket between the IgD2-YkuD domains, and a glucose molecule  
163 could be modeled into the electron density at 1.0 sigma (**Fig. 1A and S1**). This glucose  
164 molecule is likely to be part of a PG disaccharide moiety originating from the *E.coli* cell lysate  
165 during Ldt<sub>Mt2</sub> purification. The sugar molecule is ensconced at the IgD2-YkuD domain  
166 interface in a pocket, which we referred to as the S-pocket, making several electrostatic  
167 interactions with residues R209, E168, R371, Y330 and A171 (**Fig. 1A**). Three residues  
168 M157, A171 and L391 stabilize the sugar through hydrophobic interactions. To provide  
169 additional evidence for the binding of PG substrates within the S-pocket, we performed  
170 ThermoFluor assays with N-Acetylmuramyl-L-alanyl-D-isoglutamine hydrate, a precursor of  
171 PG. A higher molar concentration of N-Acetylmuramyl-L-alanyl-D-isoglutamine gradually

172 shifted the melting curve of Ldt<sub>M12</sub> indicative of saturable binding behavior. A single R209E  
173 mutation in the S-pocket disrupted the binding of N-Acetylmuramyl-L-alanyl-D-isoglutamine  
174 with Ldt<sub>M12</sub> (**Fig. 1B**).

175 An atomic model of the L,D-transpeptidase from *Bacillus subtilis* (Ldt<sub>BS</sub>) in complex  
176 with nascent PG chain has been reported earlier (PDB ID: 2MTZ) (Schanda et al., 2014).  
177 Superposition of the structures of the Ldt<sub>M12</sub>-sugar complex with the Ldt<sub>BS</sub>-PG complex  
178 suggests that longer nascent PG chains thread across the S-pocket in between the IgD1-  
179 YkuD domains of Ldt<sub>M12</sub> (**Fig. 1C**). Based on the structural details of PG binding in Ldt<sub>BS</sub> and  
180 Ldt<sub>M12</sub>, a pentameric PG chain was computationally placed across the IgD1-YkuD domain  
181 interface encompassing the S-pocket. This computational modeling of a longer PG chain  
182 spatially aligns one of its tetrapeptide stem across an inner cavity of the catalytic site (**Fig.**  
183 **1D**), similar to reports of carbapenem binding in the same position (Bianchet et al., 2017).  
184 This inner cavity of the catalytic site is proposed to bind the acceptor tetrapeptide stem, and  
185 the outer cavity to bind the donor tetrapeptide stem prior to their 3-3 transpeptide cross-  
186 linkage by Ldt<sub>M12</sub> (Erdemli et al., 2012). Based on our crystal structure and modeling study,  
187 we propose that the S-pocket anchors the disaccharide moiety of one of the nascent PG  
188 chains prior to transpeptidation of tetrapeptide stems in the catalytic site.

189

## 190 **The S-pocket modulates $\beta$ -lactam hydrolysis activity**

191 Our crystal structure reveals that the Ldt<sub>M12</sub> enzyme is composed of three distinct  
192 domains as shown in figure 2A. As the S-pocket resides within the IgD2-YkuD domain  
193 interface, we investigated whether the S-pocket or different Ldt<sub>M12</sub> domains play contributing  
194 role in the enzyme's catalytic function. Due to the lack of tractable enzymatic assays with  
195 native PG substrates for observing physiological catalytic activity, we choose nitrocefin, a  
196 chromogenic  $\beta$ -lactam, as a reporter substrate to assess the  $\beta$ -lactam hydrolysis activity  
197 (Bianchet et al., 2017). To undertake this study, we expressed and purified fragments of  
198 Ldt<sub>M12</sub> corresponding to IgD1, IgD2, IgD1-IgD2, IgD2-YkuD and YkuD domains. The full-  
199 length Ldt<sub>M12</sub> holoenzyme showed a  $V_{max}$  of 0.23  $\mu$ M/min and  $K_m$  of 16.32  $\mu$ M in the nitrocefin  
200 hydrolysis assay (**Table 2**). Deletion of the IgD1 domain assessed by the IgD2-YkuD domain  
201 fragment resulted in no effect on the  $\beta$ -lactam hydrolysis. However, deletion of IgD2 from the  
202 YkuD domain as assessed by the YkuD fragment alone led to a significant adverse effect on  
203 the nitrocefin hydrolysis activity with an increase in the  $K_m$  value to 129  $\mu$ M (an ~8-fold  
204 increase) and a decline in enzyme turn-over by ~10-fold (**Fig. 2B and Table 2**). This suggests  
205 an important role of S-pocket which is carried by the IgD2 domain in governing the catalytic

206 activity of Ldt<sub>M12</sub> enzyme. We further evaluated the role of the S-pocket by generating site-  
207 directed mutations at residues R209 and Y330 as they are situated within the S-pocket (**Fig.**  
208 **2C**). The R209E mutant hydrolyzed nitrocefin with a  $K_m$  428  $\mu$ M that is ~26 fold higher than  
209 wild-type, while its  $V_{max}$  remained the same as wild-type. A high  $K_m$  value is an indicator of  
210 weak binding of the substrate with the enzyme, and shows that the enzyme would need a  
211 greater number of substrate molecules to achieve a  $V_{max}$ . How a single R209E mutation in  
212 S-pocket would affect the  $\beta$ -lactam hydrolysis activity in a catalytic site that is ~21 Å away  
213 remains a question; however, as shown below it is likely that the S-pocket has a role in  
214 modulating the catalytic activity of Ldt<sub>M12</sub> enzyme allosterically.

215

### 216 **The S-pocket cross-talks with the catalytic site to modulate $\beta$ -lactam hydrolysis**

217 To evaluate the effects of mutations in the S-pocket on catalytic site activity ~21 Å  
218 away, we ran molecular dynamic (MD) simulations of the Ldt<sub>M12</sub> wild-type and R209E mutant  
219 proteins. After 100 ns of MD simulations, structural and conformational changes were  
220 observed in the catalytic centre of YkuD domain including the catalytic triad residues C354,  
221 H336 and S337 and other residues in the catalytic site, namely, S351, M303 and W340. After  
222 the MD simulations in wild-type Ldt<sub>M12</sub>, H336 formed a hydrogen-bond interaction with the  
223 carbonyl oxygen of C354 as well as with the side chain hydroxyl group of S351.  
224 Unexpectedly, no hydrogen bond interaction was observed between H336-N $\epsilon$ 1 and carbonyl  
225 oxygen of S337 (**Fig. 3A**) as this interaction was reported to be important for stabilizing the  
226 tautomer of H336 protonated at N $\epsilon$ 1 (Erdemli et al., 2012).

227 When we assessed the MD simulated structure of the R209E mutant, no hydrogen  
228 bond interaction were found between H336 and the hydroxyl group of the S351 residue;  
229 however, the hydrogen bond interaction with carbonyl oxygen of C354 remained conserved.  
230 Additionally, the hydrogen bond interaction between the H336-N $\epsilon$ 1 residue and the carbonyl  
231 oxygen of S337 residue was restored. Another W340 residue that resides outside the  
232 catalytic pocket comes closer to M303 and H336 through hydrophobic interactions to block  
233 the outer pocket of catalytic core. Such blockage of outer catalytic pocket would also hinder  
234 the dynamics of the YkuD flap, which has been reported to be important in  $\beta$ -lactam  
235 binding(Fakhar et al., 2017). We also observed an overall difference in the flexibility state of  
236 YkuD flap region (300-330 residues) between the wild-type and R209E mutant structures  
237 after 100ns of MD simulation (**Fig. S2**).

238 To identify the functional relevance of conformational changes in the catalytic core  
239 residues upon MD simulations in both wild-type and R209E mutant structures, we performed

240 *in-vitro*  $\beta$ -lactam hydrolysis activity with site-directed mutants of the catalytic triad residues  
241 C354, H336 and S337 and other residues namely M303 and S351 that showed significant  
242 conformation changes upon R209E mutation in MD experiments. To our surprise, mutation  
243 of catalytic triad residue S337 to S337A did not disrupt the  $\beta$ -lactam hydrolysis activity. The  
244 S337 residue was earlier reported as an important part of catalytic triad via stabilization of  
245 the protonated H336 tautomer (Erdemli et al., 2012). Mutation of C354 to C354A and H336  
246 to H336A disrupted  $\beta$ -lactam hydrolysis as expected. Additionally, mutation of the S351  
247 residue to S351A disrupted  $\beta$ -lactam hydrolysis activity, almost to the same degree as seen  
248 in the H336A mutant, with a ~15-fold decrease in enzyme turn-over (**Fig. 3B, Table 2**). In  
249 MD simulation runs with the wild-type structure, the S351 sidechain hydroxyl group forms  
250 hydrogen bond interaction with H336-N $\epsilon$ 2, and this hydrogen bond interaction is absent in  
251 the R209E mutant structure (**Fig. 3A**). H336 is important for deprotonating the C354 sulphur  
252 to allow nucleophilic attack on carbonyl group of  $\beta$ -lactam ring (Erdemli et al., 2012). We  
253 suggest that instead of the S337 residue, it is S351 that may form the catalytic triad together  
254 with C354 and H336 to stabilize the protonated H336 tautomer during  $\beta$ -lactam binding and  
255 hydrolysis.

256

### 257 **Both the S-pocket and catalytic site participate in $\beta$ -lactam recognition**

258 Among  $\beta$ -lactams, the penicillin and cephalosporin classes are readily hydrolyzed by  
259 Ldt<sub>M12</sub>, while the carbapenem class inhibits Ldt<sub>M12</sub> by irreversible acylation of C354 residue in  
260 the active site. In the current study, we used the carbapenem molecule, biapenem, to  
261 evaluate acylation of Ldt<sub>M12</sub>. The rate of acylation by biapenem was measured by monitoring  
262 a decrease in biapenem absorbance at 292nm wavelength. A single R209E mutation in the  
263 S-pocket completely disrupted biapenem-mediated acylation of the Ldt<sub>M12</sub> enzyme (**Fig. 4A**).  
264 Mutation of catalytic residues C354, H336 and S351 also abrogated acylation with biapenem.  
265 These findings suggest that both the S-pocket and the catalytic center play important roles  
266 in driving acylation of the C354 catalytic residue by biapenem.

267 To further understand the role of the S-pocket and catalytic site in biapenem binding  
268 to Ldt<sub>M12</sub>, we performed ThermoFluor assays. Different amounts of biapenem (0-400 $\mu$ M)  
269 were titrated into 5.0  $\mu$ M of Ldt<sub>M12</sub> enzyme, and thermal shifts were measured at different drug  
270 concentrations. These studies revealed interesting observations: (1) increasing  
271 concentrations of biapenem led to a gradual change in melting temperature of Ldt<sub>M12</sub> until it  
272 was fully saturated, and (2) biapenem binding decreased the melting temperature of protein  
273 (**Fig. 4B**). In the first observation, we found that Ldt<sub>M12</sub>-biapenem binding could be saturated



274 only by enzyme:drug ratios as high as 1:80. This strongly suggests that biapenem saturates  
275 a surface of Ldt<sub>M12</sub> through reversible, non-covalent interactions, as the covalent interactions  
276 have to be with a 1:1 molar ratio and are reversible. Beyond to its well-known covalent binding  
277 at the catalytic site (Kumar et al., 2017), these findings are consistent with non-covalent,  
278 saturable binding of biapenem to a second surface on Ldt<sub>M12</sub>. From the second observation,  
279 we conclude that biapenem binding destabilizes the protein possibly through structural  
280 changes. This structural destabilization may supersede the well-known structural changes in  
281 the YkuD flap at the catalytic site that are known to occur during  $\beta$ -lactam binding and  
282 covalent reaction with the S<sup>Y</sup> atom of C354 (Bianchet et al., 2017; Fakhar et al., 2017; Kim  
283 et al., 2013).

284 As the S-pocket mutant R209E exhibited diminished  $\beta$ -lactam hydrolysis (**Fig. 3B**)  
285 and acylation by biapenem (**Fig. 4A**), we further analyzed the consequence of the R209E  
286 mutation on the physical binding of biapenem. In contrast to a the gradual decrease the  
287 thermal stability displayed by wild-type Ldt<sub>M12</sub> upon biapenem binding, the R209E mutant  
288 showed only a subtle increase in T<sub>m</sub>, and the saturating property of biapenem was virtually  
289 absent even at the highest concentration of 400 $\mu$ M (**Fig. 4B**). We conclude that the R209E  
290 mutation in the S-pocket hindered both non-covalent (as seen in **Fig. 4B**) as well as covalent  
291 interactions with biapenem (as seen in **Fig. 4A**). Additionally, as biapenem binds negligibly  
292 to the R209E mutant in contrast to wild-type Ldt<sub>M12</sub>, we did not observe decreases in the melting  
293 temperature of the R209E mutant with added biapenem as would be anticipated via catalytic  
294 site structural changes in the YkuD flap (Fakhar et al., 2017). This is further illustrated by our  
295 MD simulation results wherein the R209E mutation brings W340 residue closer to the YkuD  
296 flap residue M303 and active-site core residue H336 to block access to the outer pocket of  
297 the catalytic site (**Fig. 3A**). These R209E mutation-driven structural changes in the catalytic  
298 site and YkuD flap likely account for the inability of biapenem to bind to the R209E mutant  
299 of Ldt<sub>M12</sub>.

300 As structural changes occur in the catalytic site due to mutations in the S-pocket (**Fig.**  
301 **3**), we hypothesized that catalytic site might also demonstrate an interplay with the S-pocket  
302 to indirectly influence non-covalent binding of biapenem. Binding studies were performed  
303 between biapenem and a catalytic mutant S351A using ThermoFluor assays. Indeed, the  
304 S351A mutant showed a significant decrease in its thermal stability (**Fig. 4B**). Moreover,  
305 varying concentrations of biapenem (0-400 $\mu$ M) with the S351A mutant did not induce any  
306 further significant thermal shift, indicative of negligible or insignificant physical binding of  
307 biapenem. Acylation with biapenem at the catalytic site was also diminished upon S351A

308 mutation in Ldt<sub>M12</sub> (**Fig. 4A**). These experimental observations indicate that mutations in  
309 catalytic site such as S351A disrupt both non-covalent as well as covalent binding of  
310 biapenem to Ldt<sub>M12</sub>.

311

### 312 **Two $\beta$ -lactams are recognized through cooperativity between the S-pocket and** 313 **the catalytic site**

314 From the experimental results with the wild-type, R209E and S351A mutants (**Fig.**  
315 **4**), we conclude that biapenem has two modes of binding: (1) covalent binding and (2)  
316 saturable, non-covalent binding. In both of these binding modes, our data supports a dual  
317 role of both S-pocket and the catalytic site. As covalent binding is well known at the catalytic  
318 site, saturable reversible binding seems to be at a second surface of Ldt<sub>M12</sub>. From the  
319 experimental results it is quite evident that biapenem binding at both the sites can be  
320 controlled by the S-pocket and the catalytic site. Thus, we hypothesized that both the S-  
321 pocket and catalytic site may cooperate with each other in recognition of biapenem. Towards  
322 discovering the structural basis of cooperativity, we performed docking and molecular  
323 dynamic simulation studies of biapenem with Ldt<sub>M12</sub> (**Fig. 4C**). A Ldt<sub>M12</sub> crystal structure (PDB  
324 ID: 5DU7) that has the catalytic site within the YkuD flap in closed conformation was chosen  
325 for docking with biapenem as this structure will not allow the drug binding in the catalytic  
326 pocket. A grid was assigned for docking within a 60 Å radius of the catalytic site residue  
327 C354. We found that biapenem docked well within the S-pocket through its pyrazolo[1,2-  
328 a][1,2,4]triazolium R3 group with a binding energy of -6.3 kcal/mol.

329 Next, MD simulation experiments were further performed with Ldt<sub>M12</sub> structures having  
330 biapenem docked (1) alone in S-pocket, (2) alone in catalytic pocket), (3) both in S-pocket  
331 and catalytic site. In the MD simulations with biapenem docked in S-pocket alone, the drug  
332 remained in the pocket for 9 ns of MD trajectory before exiting the pocket (**Fig. 4C**).  
333 Snapshots of different trajectories of biapenem in the S-pocket are shown in **Fig. S3**. In MD  
334 simulations with biapenem docked in the catalytic pocket alone, the  $\beta$ -lactam core ring  
335 fluctuated at a distance of 3.7-7 Å from the S<sup>Y</sup> atom of C354 during 5-40 ns (**Fig. 4C and**  
336 **S4**).

337 However, when biapenem molecules were docked in both the S-pocket and catalytic  
338 site simultaneously, the pyrazolo[1,2-a][1,2,4]triazolium R3 group of biapenem remained  
339 ensconced in S-pocket for 0-6 ns, made hydrophobic interactions with Y330 and L391 at 7-  
340 15 ns, and its pyrrolidine ring made additional  $\pi$ - $\pi$  interactions with F330 at 18-28 ns while  
341 remaining in the S-pocket, before finally moving out towards the YkuD flap of the catalytic

342 site (**Fig. 4C and S4A**). In the catalytic site over the simulation interval, biapenem movement  
343 fluctuated less this time, and its  $\beta$ -lactam carbonyl oxygen atom remained oriented towards  
344  $S^Y$  atom of C354 during 0-35 ns (see snapshots of biapenem trajectory in **Fig. S4B**). Later,  
345 from 40 ns onwards in the MD trajectory, when biapenem at S-pocket came closer to catalytic  
346 site (as shown in **Fig. S4A**), the average distance between carbonyl oxygen and  $S^Y$  atom of  
347 C354 became 3.5 Å and Y308 made a hydrogen bond with G332. Thus, MD simulations  
348 suggest that biapenem binding across the S-pocket surface imposes stability in fluctuations  
349 of  $\beta$ -lactam movement in the catalytic site and the  $\beta$ -lactam ring carbonyl group maintains a  
350 close distance with the  $S^Y$  atom of C354 that favor a nucleophilic attack (see **Fig. S4** and  
351 **S5B**). These MD simulations together with our experimental data support a model in which  
352 two biapenem molecules are recognized cooperatively by both the S-pocket and the catalytic  
353 site, with bind -covalent, saturable binding and covalent binding to acylate C354,  
354 respectively.

355

### 356 **Binding patterns of various classes of $\beta$ -lactams in the S-pocket**

357 As Ldt<sub>M12</sub> binds various  $\beta$ -lactams with variable affinities (Bianchet et al., 2017), we  
358 performed docking studies of various classes of  $\beta$ -lactams with the S-pocket. Ampicillin and  
359 oxacillin from the penicillin class, cefotaxime from the cephalosporin class, and a new  
360 experimental drug, T203, from carbapenem class were chosen. The different  $\beta$ -lactams  
361 showed binding with the S-pocket of Ldt<sub>M12</sub> with variable energy scores using Autodock vina  
362 (**Table 3**). Ampicillin docked into the S-pocket with a binding energy of -7.1 kcal/mol with its  
363 R1-group tail 2-amino-2-phenylacetyl ensconced in the S-pocket through several  
364 electrostatic and hydrophobic interactions with the M157, E207, R209, R371 and Y330  
365 residues (**Fig. 5A**). Another penicillin class member, oxacillin (a penicillinase-resistant  
366 penicillin), displayed the highest binding energy of -8.3 kcal/mol through its R1 group 5-  
367 methyl-3-phenyl-1,2-oxazole-4-carbonyl binding in the S-pocket (**Fig. S6**). Cefotaxime  
368 docked to the S-pocket with a binding score of -7.8 kcal/mol through R1-group tail thiazol-4yl  
369 (**Fig. 5B**). The new carbapenem T203 docked to the S-pocket with the least -6.9 kcal/mol  
370 binding with its R3 group 2-isopropoxy-2-oxoethyl (**Fig. 5C**), similar to the biapenem R3  
371 group (**Fig. 4C**). The  $\beta$ -lactam ring moieties of all of these  $\beta$ -lactams were found to be free  
372 of any interactions with the S-pocket or surrounding residues, similar to biapenem. However,  
373 after 18-28 ns of MD simulation trajectory, the pyrrolidine ring of biapenem could make  $\pi$ - $\pi$   
374 interaction with F330 (**Fig. 4C and Fig. S4A**), and it is possible that similar late binding  
375 interactions may occur similarly with other the  $\beta$ -lactams.

376 ThermoFluor assays were also performed to investigate the binding behaviors of  
377 these additional  $\beta$ -lactam class members with Ldt<sub>M12</sub>. Ampicillin, which has been reported to  
378 be readily hydrolyzed by Ldt<sub>M12</sub> (Bianchet et al., 2017), showed a saturable binding behavior  
379 (**Fig. 5A**), but to a significantly lower degree than biapenem (**Fig. 4B**). Surprisingly, with  
380 ampicillin the R209E mutation in the S-pocket completely reversed the gradual thermal shift  
381 in Ldt<sub>M12</sub> towards a higher T<sub>m</sub> indicative of an increase in structural stability in the setting of  
382 clearly saturable binding (**Fig. 5A**). We interpret this to be consistent with reversible acylation  
383 of the C354 residue by ampicillin in addition to S-pocket binding. In support of this, a  
384 reversible acylation of the L,D-transpeptidase (Ldt<sub>fm</sub> from *E.coli*) by  $\beta$ -lactams in the catalytic  
385 site has been reported recently (Edoo et al., 2017; Zandi and Townsend, 2021). Oxacillin  
386 also showed a saturable binding with Ldt<sub>M12</sub> (**Fig. S6**). With cefotaxime, the R209E mutation  
387 in the S-pocket strongly diminished saturable binding. And lastly, binding of new carbapenem  
388 drug T203 displayed a large thermal shift with Ldt<sub>M12</sub> (**Fig. 5C**), similar to biapenem (**Fig. 4C**).  
389 We conclude that many  $\beta$ -lactams (despite being weak or strong inhibitors of Ldt<sub>M12</sub> activity)  
390 bind through the S-pocket with a saturable binding behavior; however, the carbapenem class  
391 brings maximum thermal destabilization in protein structure due to non-hydrolyzable covalent  
392 binding in catalytic site. Other classes of  $\beta$ -lactam drugs, specifically the penicillins and  
393 cephalosporins, are known to be readily hydrolysed by Ldt<sub>M12</sub> (Cordillot et al., 2013; Kumar et  
394 al., 2017).

395

### 396 **Structural basis of allosteric changes between the S-pocket and catalytic site**

397 To further understand the high-resolution details of structural changes may that occur  
398 in Ldt<sub>M12</sub> upon  $\beta$ -lactam binding, the crystal structure of Ldt<sub>M12</sub> was solved in complex with the  
399 new carbapenem drug T203 at a 1.7 Å resolution. Electron densities were observed in both  
400 the S-pocket and the outer cavity of catalytic pocket in the Ldt<sub>M12</sub>. Consistent with our docking  
401 results of T203 drug with Ldt<sub>M12</sub> (**Fig. 5C**), the 2-oxoethyl side-chain of R3 group from T203  
402 could be modelled into the electron density of the S-pocket. A second T203 drug was also  
403 modelled into the electron density map of the catalytic pocket. **Fig. 6A and 6B** show the 2Fo-  
404 Fc electron density map (contoured at 1.0 $\sigma$ ) of T203 modelled in the S-pocket and catalytic  
405 site of the Ldt<sub>M12</sub> in the crystal structure.

406 In the S-pocket of Ldt<sub>M12</sub>, the 2-oxoethyl sidechain of T203 drug is stabilized through  
407 hydrophobic interactions with the A171, M157, P169 and L390 residues (**Fig. 6A and S7A**).  
408 R371 makes an electrostatic interaction with the oxygen of the 2-oxoethyl moiety. No electron  
409 density was observed for the pyrrolidine ring of T203, while its carboxylic group fitted into an

410 electron density making electrostatic interactions with backbone nitrogen of S296 and the  
411 guanidium side chain of R371. The modelling results of T203 into the electron density of the  
412 S-pocket were similar to the docking results of T203 drug and biapenem that also have their  
413 R3 group ensconced into the S-pocket with their pyrrolidine ring remaining free of any  
414 interaction with Ldt<sub>M12</sub> (**Fig. 5**).

415 In the catalytic site, the T203 carbapenem interacts with the outer cavity at a covalent  
416 distance from the S<sup>Y</sup> atom of C354 (**Fig. 6B and S7B**). The carbonyl oxygen of T203 makes  
417 hydrogen bond interactions with the hydroxyl group of Y318. The electron density for the R1-  
418 hydroxy ethyl group was not found, similar to three other related new carbapenems T206,  
419 T208 and T210 (Bianchet et al., 2017; Kumar et al., 2017). The methyl group of the pyrrolidine  
420 ring makes hydrophobic interaction with the phenyl ring of Y318. The amino N4 of the  
421 pyrrolidine ring makes electrostatic interactions with Nε2 of H336 and the backbone amide  
422 nitrogen of H352. The carboxyl group at C3 of the pyrrolidine ring makes hydrogen bond  
423 interactions with the side chains of W340 and N356. W340 also forms hydrophobic  
424 interactions with the 2-oxoethyl tail of T203.

425 We compared the structure of the Ldt<sub>M12</sub>-T203 complex with the C354A catalytic  
426 mutant structure (PDB ID: 3TX4) to seek alterations in conformation states of the enzyme  
427 around its catalytic site, YkuD flap, and S-pocket upon β-lactam binding. We chose the  
428 catalytic mutant structure of Ldt<sub>M12</sub> for structural comparison studies only because the wild-  
429 type enzyme usually binds ligands and/or substrates from its recombinant bacterial source  
430 during the purification steps (Erdemli et al., 2012), including in the current study. We observed  
431 that binding of the T203 drug introduces unique allosteric alterations in the salt bridge and  
432 hydrogen bond interactions spanning the entire distance from the S-pocket to the YkuD flap  
433 of the catalytic site. Upon T203 drug binding, the YkuD flap bends slightly towards the S-  
434 pocket (**Figure 6C**). In the S-pocket, the M157 side chain moves closer to the drug by 1.5 Å  
435 to make a hydrophobic interaction with the 2-oxoethyl tail of T203 drug (**Fig. 6D**). The R371  
436 residue that was making salt bridge with E168 moves towards S296 through a hydrogen  
437 bond interaction and makes an additional ionic interaction with the carboxyl group of the T203  
438 drug. The Q327 side chain that was previously producing a steric conflict with the carboxyl  
439 group of T203 drug moves away by a distance of 1.8 Å to make a water-mediated salt bridge  
440 with the hydroxyl group of Y308 that also moves down towards the S-pocket by a distance  
441 of 2.1 Å. The T203 drug binding induces an additional alteration in the YkuD flap by breaking  
442 the hydrogen bond interactions of H300 with D323 as well as D321 and also the interactions  
443 between D304 and S306. Breaking of these hydrogen bond interactions possibly relaxes the

444 YkuD flap, enabling it to tilt towards the S-pocket mediated by new water-mediated salt bridge  
445 between Y308 and Q327. Alterations in the dynamics of the YkuD flap was also observed in  
446 MD simulations with the R209E mutant and by biapenem binding in S-pocket (**Fig. 3A and**  
447 **Fig. 4**).

448 In summary, the evidence supporting the identity of S-pocket as allosteric site  
449 includes its distance of 21 Å from the catalytic residue C354, the observation of saturable  
450 binding by  $\beta$ -lactam drugs in addition to covalent binding, and lastly, the substantial  
451 conformational alterations between the S-pocket and catalytic site upon  $\beta$ -lactam binding.  
452 Mutational changes in the S-pocket or the catalytic pocket nullifies all the allosteric  
453 communications that are otherwise important in cooperative binding of dual  $\beta$ -lactams. The  
454 consequences of these mutational changes were confirmed by  $\beta$ -lactam hydrolysis assays  
455 (**Fig. 2C & 3B**), acylation by biapenem (**Fig. 4A**) and ThermoFluor assays (**Fig. 4B & 5**) with  
456 different class of  $\beta$ -lactams.

457

458

## 459 **DISCUSSION**

460 In addition to the role of L,D-transpeptidases in remodelling the PG in non-replicating  
461 *M. tb* (Lavollay et al., 2008), this enzyme class is responsible for the resistance of *M.tb* to  
462 most  $\beta$ -lactam drugs, except carbapenems (Cordillot et al., 2013; Gupta et al., 2010). The  
463 molecular mechanisms and physiological function of L,D-transpeptidases and the basis for  
464 their genetic susceptibility to selective  $\beta$ -lactams remains incompletely understood. In this  
465 study we reveal important aspects of the physiological function of the *M.tb* L,D-  
466 transpeptidase enzyme, Ldt<sub>M12</sub>, identify a new PG disaccharide moiety binding pocket (named  
467 the S-pocket), and describe the S-pocket's role in allosteric modulation of the transpeptidase  
468 active site. Additionally we observe that various  $\beta$ -lactams bind to the S-pocket through their  
469 tail regions to bring about allosteric changes which predispose the catalytic site for covalent  
470 inactivation by a second  $\beta$ -lactam. Based on our findings, we propose a mechanism of  
471 allosteric communication between the S-pocket and the catalytic site in facilitating dual  $\beta$ -  
472 lactam and/or dual PG substrate binding in Ldt<sub>M12</sub> (**Figure 7**).

473 *M.tb* contains several paralogs of L,D-transpeptidases, namely Ldt<sub>M11</sub>, Ldt<sub>M12</sub>, Ldt<sub>M13</sub>,  
474 Ldt<sub>M14</sub> and Ldt<sub>M15</sub> (Gupta et al., 2010). Crystal structures of Ldt<sub>M11</sub> (Correale et al., 2013), Ldt<sub>M12</sub>  
475 (Erdemli et al., 2012), Ldt<sub>M13</sub> (Libreros-Zuniga et al., 2019) and Ldt<sub>M15</sub> (Brammer Basta et al.,  
476 2015) have been solved and reported to date. All of these paralogs contain a pocket similar  
477 to the S-pocket found in Ldt<sub>M12</sub>. Corresponding to the R209 residue position in Ldt<sub>M12</sub> S-pocket,

478 Ldt<sub>M1</sub> has R25, Ldt<sub>M3</sub> has Q66, and Ldt<sub>M5</sub> has H219, and each of these putative S-pocket  
479 amino acids have similar basic charge properties (**Figure S8**). Moreover, superposition of  
480 the crystal structure of these paralogs with Ldt<sub>M2</sub>-sugar complex places the PG sugar moiety  
481 within the S-pocket. We suggest a common S-pocket-mediated allosteric mechanism in all  
482 of the L,D-transpeptidases in *M.tb*; however, the rate of transpeptidation may differ  
483 depending upon structural differences in their respective YkuD flaps, S-pockets and catalytic  
484 sites.

485 Bases on our crystal structure and modelling studies, we propose that prior to the 3-  
486 3 transpeptidation between the donor and acceptor PG stem peptides, the acceptor PG sugar  
487 moiety chain is anchored across the IgD1-YkuD domains interface to the S-pocket of Ldt<sub>M2</sub>.  
488 PG sugar chain anchoring has been observed in L,D-transpeptidase of *Bacillus subtilis*  
489 through a PG recognition domain LysM (Schanda et al., 2014). The LysM domain binds a  
490 sugar moiety of the PG precursor, and the tetrapeptide branch (acceptor stem) contacts the  
491 catalytic cysteine residue through the inner cavity of the catalytic domain. Another PG binding  
492 enzyme lysostaphin from *Staphylococcus simulans* has a PG anchoring domain, SH3b, while  
493 its catalytic domain cleaves PG stem cross-bridge (Mitkowski et al., 2019). Upon anchoring  
494 of the PG sugar moiety chain within the S-pocket in Ldt<sub>M2</sub>, its acceptor stem peptide binds to  
495 the inner pocket of the enzyme's catalytic domain, and the donor stem binds to the outer  
496 cavity close to the C354 residue, interactions that foster formation of the 3-3 transpeptide  
497 linkage (Bianchet et al., 2017; Erdemli et al., 2012; Fakhari et al., 2017). We hypothesize that,  
498 prior to 3-3 transpeptide linkage, both S-pocket and catalytic site may work in cooperativity  
499 to facilitate synchronous binding of two PG substrates (donor and acceptor substrates);  
500 however, this requires experimental validation using nascent PG substrates that are beyond  
501 the scope of our study. Nevertheless, in support of our proposed model, we have tested our  
502 cooperativity hypothesis on  $\beta$ -lactam binding and hydrolysis activity in Ldt<sub>M2</sub> and found  
503 results that support the model.

504 Ldt<sub>M2</sub> plays a major role in the resistance of *M.tb* to  $\beta$ -lactam class of drugs (Cordillot  
505 et al., 2013; Dubee et al., 2012; Gupta et al., 2010; Lavollay et al., 2008; Mainardi et al.,  
506 2005). Among the  $\beta$ -lactam class of drugs, penicillins and cephalosporins are readily  
507 hydrolyzed by this enzyme, while carbapenems are potent Ldt<sub>M2</sub> inhibitors (Bianchet et al.,  
508 2017). Our findings reveal the role of both the S-pocket and the catalytic site in regulating  $\beta$ -  
509 lactam hydrolysis and inhibition by the carbapenem class. We demonstrate an allosteric  
510 cooperativity between the S-pocket and the catalytic site in the dual recognition of  
511 carbapenem drugs, with the former one binding the carbapenem frug non-covalently with a

512 saturable binding and the latter one covalently through irreversible acylation of C354. A  
513 similar  $\beta$ -lactam binding mechanism has been observed in penicillin-binding protein 2a  
514 (PBP2a) from *Streptococcus aureus* where one molecule of  $\beta$ -lactam occupies an allosteric  
515 site (with a saturable binding behavior) 60 Å away culminating into the allosteric  
516 conformational changes in PBP2a with the opening of the active site and covalent binding  
517 with a  $\beta$ -lactam molecule (Otero et al., 2013). During the  $\beta$ -lactam binding process, Ldt<sub>M12</sub>  
518 occupies one molecule of  $\beta$ -lactam at a reversible binding site (the S-pocket) 21 Å away from  
519 the catalytic site, and this interaction stimulates allosteric conformational changes across the  
520 YkuD catalytic flap to drive acylation by a second  $\beta$ -lactam molecule in the catalytic pocket.  
521 We find the role of catalytic site equally important in stimulating reversible binding of  $\beta$ -lactam  
522 in the S-pocket. Thus there we observe bi-directional cooperativity between the S-pocket and  
523 the catalytic site in binding dual  $\beta$ -lactams, and the same mechanism may be applied to dual  
524 PG substrate binding. The role of differential dynamics by the YkuD flap in  $\beta$ -lactam- and  
525 substrate-binding by the catalytic site have been demonstrated earlier by MD simulations  
526 (Fakhar et al., 2017); however, the role of the YkuD flap in dual  $\beta$ -lactam binding by the S-  
527 pocket and the catalytic site is demonstrated for the first time by this study. Several allosteric  
528 alterations mediated by new water-mediated salt-bridges or breakage of pre-existing ionic  
529 interactions contribute to the cumulative dynamics of the YkuD flap during dual  $\beta$ -lactam  
530 binding in Ldt<sub>M12</sub>.

531 We find that various  $\beta$ -lactams bind to the S-pocket of Ldt<sub>M12</sub> through their tail regions,  
532 either through their R1 or R3 groups. As we found the docking scores of ampicillin, oxacillin,  
533 and cefotaxime to be higher than those of carbapenems, the interactions of these R1 or R3  
534 groups with the S-pocket appear to play a critical role in the initiation of S-pocket binding,  
535 irrespective of the fate of  $\beta$ -lactams in the catalytic site. This discovery of a novel mechanism of  $\beta$ -  
536 lactam binding in Ldt<sub>M12</sub> reveals important new parameters in the development of novel  $\beta$ -  
537 lactams for *M. tb*, and highlights the importance of the respective R1 and R3 side chains to  
538 both occupy the S-pocket and modulate strong inhibition at the catalytic site.

539

## 540 **SIGNIFICANCE**

541 Biosynthesis of bacterial cell wall peptidoglycan (PG) is inhibited by the  $\beta$ -lactam  
542 class of antibiotics. *Mycobacterium tuberculosis* susceptibility to  $\beta$ -lactams is subclass  
543 specific as the carbapenems, but not the penicillins and cephalosporins, exhibit potent  
544 activity against this mycobacteria through effective inhibition of its L,D-transpeptidases,  
545 which catalyses 3-3 transpeptidation reaction in the biosynthesis of PG. A better



546 understanding of L,D-transpeptidase function and mechanism of binding with natural  
547 substrate and various  $\beta$ -lactams can provide insight necessary to leverage L,D-  
548 transpeptidases as targets for drug development. Based on our structural, biophysical and  
549 biochemical data, we identify a new PG disaccharide moiety binding pocket (named as S-  
550 pocket) at a distance of 21 Å from the catalytic site in the L,D-transpeptidase Ldt<sub>M12</sub>. This new  
551 site recognizes  $\beta$ -lactams and modulate their hydrolysis. Our experimental and  
552 computational studies identify a allosteric cooperativity between S-pocket and the catalytic  
553 site in recognising dual  $\beta$ -lactams, wherein  $\beta$ -lactams bind S-pocket with saturable binding  
554 behaviour. Our crystallographic studies further reveal the high-resolution details of allosteric  
555 alterations that span across the S-pocket and catalytic site during dual  $\beta$ -lactam binding.  
556 Identification of a cooperativity between S-pocket and catalytic site also represents a  
557 valuable case to investigate recognition of natural substrates prior to 3-3 transpeptide  
558 reaction. A model summarizing the molecular mechanism of two  $\beta$ -lactams and/ substrate  
559 recognition is proposed based on our structural and biochemical data.

560

561

## 562 **MATERIALS & METHODS**

563

### 564 **Cloning and site-directed mutagenesis**

565 DNA sequences encoding Ldt<sub>M12</sub>- $\Delta$ 42, Ldt<sub>M12</sub>- $\Delta$ 55, IgD1 (50-145 aa residues), IgD2 (150-250  
566 aa), IgD1-IgD2 (50-250 aa) and YkuD domain (250-408) and CTSD deletion mutant Ldt<sub>M12</sub>  
567 42-384 were cloned in pET28a vector to express the protein with *N*-terminal His<sub>6</sub>-tag that  
568 is cleavable by Tobacco Etch Virus (TEV) protease. Single amino acid substitutions of  
569 Ldt<sub>M12</sub>- $\Delta$ 55 were constructed by site-directed mutagenesis for the following mutations:  
570 R209E, C354A, H352A, H336A, M303A, S337A and S351A as described(Bianchet et al.,  
571 2017). Primers used to clone different fragments of Ldt<sub>M12</sub> using H37Rv chromosomal DNA  
572 are listed here:

573 IgD1 domain-Forward primer: attgccatatgaagggcagccggttcgccgatc

574 IgD1 domain-Reverse primer: caatactcgagttaggtctggaaggtcagctggcg

575 IgD2 domain-Forward primer: attgccatatgacctgacctgccctacgtcat

576 IgD2 domain-Reverse primer: caatactcgagttagccgatggtgaagtgcgtctg

577 IgD1+ IgD2 domain-Forward primer: attgccatatgaagggcagccggttcgccgatc

578 IgD1+ IgD2 domain- Reverse primer: caatactcgagttagccgatggtgaagtgcgtctg

579 YkuD domain-Forward primer: attgccatatgggcgacgaggtgatcgcgacc

580 YkuD domain- Reverse primer: caatactcgagttacgccttggcgttaccggc

581

### 582 **Protein expression and purification**

583 Mutants and different fragments of Ldt<sub>M12</sub> were expressed and purified as reported  
584 earlier (Bianchet et al., 2017). In detail, Ldt<sub>M12</sub>-ΔN55 was transformed in chemical  
585 competent *E. coli* BL21δε3 (NEB labs). A single colony of transformed cells was inoculated  
586 in 50mL of Luria-Bertani (LB) media supplemented with ampicillin (100 µg/mL) before  
587 growing overnight (O/N) at 37°C in an incubator shaker. The O/N culture was used to  
588 inoculate secondary culture in LB media to grow at 37°C until the optical density at 600 nm  
589 reached ~0.6-0.8. At this stage, temperature was lowered to 16°C in the incubator shaker  
590 before inducing the protein expression with 0.5 mM of isopropyl-1-thio-β-galactoside (IPTG).  
591 The secondary culture grown O/N. The culture was harvested and the cell pellet was  
592 resuspended in lysis buffer (50 mM Tris buffer pH 7.5, 400 mM NaCl, 10% glycerol, 1.0 mM  
593 Dithiothreitol (DTT) and 1.0mM Phenylmethylsulfonyl fluoride (PMSF). 0.5mg/ml lysozyme  
594 was added into the resuspended cells to allow cell lysis at 4°C for 30 minutes. Resuspended  
595 cells were further lysed by ultrasonication at 4 °C with a pulse rate of 15 second ON/OFF.  
596 Whole cell lysate was centrifuged at 10,000g for 45 minutes and the supernatant was loaded  
597 onto Ni-NTA column (Qiagen, Germany). The unbound protein was washed with washing  
598 buffer (50 mM Tris buffer pH 7.5, 400 mM NaCl, 10% glycerol, 1.0mM DTT, 0.1 mM PMSF)  
599 and the protein was eluted with elution buffer (50 mM Tris buffer pH 8.0, 400 mM NaCl,  
600 1.0mM DTT, 0.1 mM PMSF and 500 mM imidazole). The His<sub>6</sub>-tag of the protein was removed  
601 by TEV protease during overnight dialysis against the buffer 50 mM Tris pH 8.0, 150 mM  
602 NaCl, and 1.0mM DTT at 4°C. The dialyzed protein was passed through Ni-NTA column and  
603 the His<sub>6</sub>-tag-removed protein was collected in flow-through. Protein was further purified using  
604 superdex 10/300 column on ÄKTA™ pure 25. The purified protein was concentrated to 20  
605 mg/ml as measured by nanodrop at 280nm wavelength. The purity of protein was checked  
606 by 12% SDS-PAGE. All other truncation and mutants of Ldt<sub>M12</sub> were also purified by same  
607 protocol as above, however their His<sub>6</sub>-tag was not removed.

608

### 609 **ThermoFluor assays**

610 The proteins Ldt<sub>M12</sub>-Δ55, R209E and S351A were with initial stocks of 11.5 µM, 14.0 µM and  
611 21 µM respectively in the 50 mM Tris buffer pH 8.0, 150mM NaCl, 1 mM DTT. 5,000x of  
612 SYPRO™ Orange (Invitrogen) was diluted to 50x in water. 5 µM of proteins and 3x of  
613 SYPRO™ Orange were pipetted into a 96-well PCR plate (BioRad, MicroAmp Fast 96-Well

614 Reaction plate, 0.1mL) with 50 $\mu$ l total volume in the well. Fluorescence data was collected  
615 on BioRad StepOnePlus Real-Time PCR System using the software StepOne software v2.3.  
616 ROX (SYPRO Orange) was selected as a reporter dye and none for passive reference in the  
617 software. The temperature was held for 1 min per degree from 25 to 65°C. Melting  
618 temperature ( $T_m$ ) and differential fluorescence ( $-dF/dT$ ) values were calculated by fitting the  
619 data on Sigmoidal dose-response (variable slope) equation in GraphPad Prism software.  
620 Experiments were performed in biological triplicates.

621

### 622 **Nitrocefin hydrolysis assays**

623 Nitrocefin (Calbiochem) with a range of 1-400  $\mu$ M was used as a substrate for quantifying  
624 the rate of  $\beta$ -lactam hydrolysis by different Ldt<sub>M12</sub> fragments and mutants. A 100 $\mu$ l reaction  
625 mixture containing 5  $\mu$ M enzyme in 25 mM HEPES–MES–Tris-Phosphate buffer, 300 mM  
626 NaCl, pH 6.0, was incubated at 25°C. Nitrocefin hydrolysis was measured at 496 nm on  
627 BioRad microplate reader and the absorbance data were converted to  $\mu$ M/minute using  
628 Beer's Law ( $e = 20,500 \text{ M}^{-1} \text{ cm}^{-1}$  for hydrolyzed nitrocefin;  $L = 0.5 \text{ cm}$ ). The rate constants,  
629  $V_{\text{max}}$  and  $K_m$  were calculated by fitting the data on nonlinear regression curve with Michaelis-  
630 Menten equation.

631

### 632 **Biapenem acylation assays**

633 The acylation of biapenem with Ldt<sub>M12</sub> and mutants was determined by measuring the  
634 reduction in absorbance of biapenem at 292nm wavelength using UV–Visible  
635 spectrophotometry. A 100 $\mu$ l reaction mixture containing 50 $\mu$ M enzyme, 50 $\mu$ M Biapenem,  
636 25mM tris buffer pH 7.5 was incubated at 15°C and endpoint absorbance was recorded at  
637 30s intervals for 8 minutes. Rate constant (K) of biapenem acylation was calculated by fitting  
638 the data on a nonlinear regression curve with one-phase decay. Experiment was performed  
639 in biological triplicates to calculate standard deviation and average values.

640

### 641 **Protein Crystallization**

642 Purified Ldt<sub>M12</sub> (fragment  $\Delta$ N55) was crystallized with the same conditions has reported  
643 earlier(Bianchet et al., 2017). Crystals were grown by hanging drop vapor diffusion method  
644 in 20% 5000MME and 200 mM ammonium sulphate condition. For Ldt<sub>M12</sub>-T203 complex,  
645 crystals were soaked with 2mM of T203 drug overnight before being cryo-protected in 20%  
646 5000 MME, 30% glycerol and 120 mM ammonium sulphate before flash freezing in liquid  
647 nitrogen.

648

### 649 **Crystal diffraction, data collection and structure determination**

650 The crystals were diffracted at 100K temperature at a wavelength of 1.0 Å on beamline 19-  
651 ID at the Advanced Photon Source (Argonne National Laboratory). The diffraction data were  
652 recorded on an ADSC Quantum 315r CCD detector and processed with the HKL3000  
653 software.(Minor et al., 2006) The crystal structures of Ldt<sub>M12</sub>-sugar complex at a highest  
654 resolution of 1.58 Å and Ldt<sub>M12</sub>-T203 complex at 1.7 Å resolution were solved by molecular  
655 replacement method using *PHENIX* suite of program(Liebschner et al., 2019) using the  
656 coordinates of Ldt<sub>M12</sub> (PDB ID: 5DU7) as a search model. The initial structures were subjected  
657 to crystallographic refinement with *phenix.refine*(Afonine et al., 2012) from the *PHENIX* suite  
658 of programs. Structures were rebuilt with COOT(Emsley and Cowtan, 2004) to fit the electron  
659 density map. Structure validation was done using Molprobity(Williams et al., 2018). The R  
660 values of refined structures (**Table 1**) are well within the range of typical resolution. Omit  
661 maps for ligands in the structures were created from map coefficient using *PHENIX* suite of  
662 programs. Figures were prepared using PyMOL Molecular Graphics System, Version 1.5.0.4  
663 Schrödinger, LLC.

664

### 665 **Docking studies**

666 Autodock vina(Trott and Olson, 2010) was used for docking studies. Ldt<sub>M12</sub> (PDB ID: 5DU7)  
667 with closed active-site loop was used for docking studies with different β-lactam ligands  
668 namely Ampicillin, Cefotaxime, Biapenem & T203. The grid for docking was assigned nearby  
669 the C354 residue so as to allow the ligands bind in close proximity (within 60 Å covering the  
670 area of PG- pocket).

671

### 672 **Molecular dynamics studies**

673 Explicit water (TIP3P) MD simulations of Ldt<sub>M12</sub>, R209E mutant and Ldt<sub>M12</sub>-biapenem complex  
674 were carried out with AMBER16 employing ff03 force field(Duan et al., 2003). Leap module  
675 of AMBER16 was used for setting up initial structures. All solvated structures were energy  
676 minimized to prevent steric clashes. System were heated using Langevin dynamics from 10  
677 to 300 K at NPT ensemble with a positional restraint of 5 kcal/mol/Å<sup>2</sup>. Positional restraint  
678 was released gradually in the next two steps i.e. 3 kcal/mol/Å<sup>2</sup> in 1st step and then 1  
679 kcal/mol/Å<sup>2</sup> in 2nd step. Finally, the production runs (Ldt<sub>M12</sub> = 100 ns, R209E = 100 ns,  
680 Ldt<sub>M12</sub>\_Bia-site\_1 = 75 ns, Ldt<sub>M12</sub>\_Bia\_site\_2 = 75 ns, Ldt<sub>M12</sub>\_Bia\_site\_1\_2 = 75 ns) were

681 carried out at NPT ensemble by integrating the Newtonian equation of motion at every 2 fs.  
682 Trajectories were analysed using cpptraj module of AMBER16.

683

#### 684 **Accession codes**

685 Coordinates and structure factors of both Ldt<sub>M12</sub>-sugar complex and Ldt<sub>M12</sub>-T203 complex have  
686 been deposited in the PDB under the accession codes 7F71, 7F8P

687

#### 688 **ACKNOWLEDGEMENTS**

689 T203 drug was a kind gift from Dr. Joel S. Freundlich at Rutgers University Medical School.  
690 We thank personnel at Argonne National Laboratory for data collection of protein crystals.  
691 This study was supported by the funding from Department of Biotechnology, Government of  
692 India (BT-RLF/Re-entry/68/2017), SERB-Core Research Grant (CRG/2019/005079), Indian  
693 Council for Medical Research (ICMR) Adhoc grant (BMS/ADHOC/10/2019-20) and UGC-  
694 start-up grant (F.30-520/2020-BSR) to P.K. This study was also supported by NIH awards  
695 R33 AI111739 and R21 AI137720 to GL. This research was supported in part by PL-Grid  
696 Infrastructure. Computations were performed at Academic Computer Centre Cyfronet AGH.

697

#### 698 **AUTHOR CONTRIBUTIONS**

699 PK (study conceptualization and design, protein-drug interactions, protein crystallization,  
700 data collection and structural studies, data analysis, manuscript preparation), GL (study  
701 conceptualization and design, cloning and site-directed mutagenesis, manuscript  
702 preparation), WRB (data analysis and manuscript preparation), NA (Cloning & site-directed  
703 mutagenesis, protein expression & purification, ThermoFluor assays, data analysis), SK  
704 (computational studies), VC (protein expression and purification, nitrocefin hydrolysis and  
705 acylation assays with biapenem), KS (computational studies and data analysis), PJ (data  
706 analysis), CKB (data analysis and manuscript preparation). All authors contributed to the final  
707 draft of the manuscript. The authors declare no competing financial interests.

708

709

710

711

712

713

714

715 **FIGURE LEGENDS**

716 **Figure 1. Binding studies of peptidoglycan with Ldt<sub>M12</sub>.** (a) Crystal structure of Ldt<sub>M12</sub> in  
717 complex with one glucose molecule. The inset shows the 2Fo-Fc omit map (contoured at  
718 1.0 $\sigma$ ) of glucose (cyan colour) modelled into the S-pocket of Ldt<sub>M12</sub> in the crystal structure.  
719 (b) ThermoFluor assay for binding studies with the PG-precursor N-Acetylmuramyl-L-alanyl-  
720 D-isoglutamine hydrate with wild type Ldt<sub>M12</sub> and the R209E mutant. The dotted line indicates  
721 the T<sub>m</sub>, and a red arrow indicates the direction of thermal shift. Assays were performed in  
722 biological triplicates, and graphs were plotted by fitting the data on Sigmoidal dose-response  
723 (variable slope) equation in GraphPad Prism software. (c) Superposition of Ldt<sub>M12</sub> (green)  
724 with PG-bound Ldt<sub>Bs</sub>, the *Bacillus subtilis* L,D-transpeptidase (PDB ID: 2MTZ) (blue). (d)  
725 Modelling of peptidoglycan (pink color) into the Ldt<sub>M12</sub> crystal structure (green).

726 **Figure 2. Role of the S-pocket in  $\beta$ -lactam hydrolysis.** (a) The structure of Ldt<sub>M12</sub> with each  
727 domain highlighted: IgD1 (orange), IgD2 (blue), YkuD domain (green) and CTSD domain  
728 (cyan). A red dotted line demarcates the 21 Å distance between the S-pocket and the  
729 catalytic site. (b) Chromogenic nitrocefin hydrolysis activity of truncated Ldt<sub>M12</sub> fragments  
730 corresponding to the IgD1, IgD2, IgD1-IgD2, YkuD, and IgD2-YkuD domains. (c)  
731 Chromogenic nitrocefin hydrolysis activity of wild-type Ldt<sub>M12</sub>, R209E, and Y330F mutants.  
732 Nitrocefin hydrolysis assays were performed in experimental duplicates and graphs were  
733 plotted in GraphPad Prism software by fitting the data on nonlinear regression curves using  
734 the Michaelis-Menten equation.

735 **Figure 3. S-pocket crosstalk with the catalytic site of Ldt<sub>M12</sub>** (a) Molecular dynamic (MD)  
736 simulation of wild-type Ldt<sub>M12</sub> (green) and the R209E mutant (pink). A red arrow indicates a  
737 shift in YkuD flap in R209E mutant during 100 ns of MD. The inset shows a detailed view of  
738 the catalytic site of the wild-type protein and R209E mutant after 75 ns of MD simulations.  
739 (b) Chromogenic nitrocefin hydrolysis activity of wild-type Ldt<sub>M12</sub> and different mutants with  
740 alterations in both the S-pocket and catalytic site. Nitrocefin hydrolysis assays were  
741 performed in experimental duplicates and graphs were plotted in GraphPad Prism by fitting  
742 the data on nonlinear regression curves with the Michaelis-Menten equation.

743 **Figure 4. Role of the S-pocket and catalytic site in recognizing biapenem.** (a) Acylation  
744 activity of biapenem with Ldt<sub>M12</sub> and mutants was monitored at 292nm wavelength using  
745 UV-Visible spectrophotometry. Maximum absorbance spectra of biapenem was found at  
746 292 nm that was used to monitor decrease in biapenem concentration upon acylation with  
747 the Ldt<sub>M12</sub>. The experiment was performed in biological triplicates to calculate the average  
748 values and standard deviations . Graphs were plotted in GraphPad Prism by fitting the data

749 on a nonlinear regression curve with one-phase decay. (b) ThermoFluor assays for binding  
750 of biapenem with Ldt<sub>M12</sub> and the R209E and S351 mutants. (c) Molecular dynamic  
751 simulations of Ldt<sub>M12</sub> in complex with biapenem. Ldt<sub>M12</sub> is represented in green and biapenem  
752 in pink. The red arrow indicates the movement of biapenem to a second position revealed by  
753 the MD simulations.

754 **Figure 5. Binding of various classes of  $\beta$ -lactams to the S-pocket.** (a) Top: ampicillin  
755 (stick model in green) bound to the S-pocket (cyan) of Ldt<sub>M12</sub> through its R1 group side-chain,  
756 2-amino-2-phenylacetyl (red oval). Bottom: ThermoFluor assays for binding studies of  
757 ampicillin with wild-type Ldt<sub>M12</sub> and the R209E mutant. (b) Top: cefotaxime (stick model in  
758 green) bound to the S-pocket (cyan) of Ldt<sub>M12</sub> through its R1 group side-chain, thiozol-4yl (red  
759 oval). Bottom: ThermoFluor assays for binding studies of cefotaxime with wild-type Ldt<sub>M12</sub> and  
760 the R209E mutant. (c) Top: the experimental carbapenem drug T203 (stick model in green)  
761 bound to the S-pocket (cyan) of Ldt<sub>M12</sub> through its R3 group side-chain, 2-isopropoxy-2-  
762 oxoethyl (red circle). Bottom: ThermoFluor assays for binding studies of T203 drug with wild-  
763 type Ldt<sub>M12</sub> and the R209E mutant.

764 **Figure 6. Structural studies of Ldt<sub>M12</sub> with the experimental T203 carbapenem drug and**  
765 **allosteric conformation analyses.** (a) The 2Fo-Fc map (contoured at 1.0 $\sigma$ ) of the T203-R3  
766 group side chain, 2-isopropoxy-2-oxoethyl (pink), modelled in the S-pocket of Ldt<sub>M12</sub> in the  
767 crystal structure. (b) The 2Fo-Fc omit map (contoured at 1.0 $\sigma$ ) of the full T203 structure (pink)  
768 modelled in the catalytic-site of Ldt<sub>M12</sub> where it acylates the C354 residue of Ldt<sub>M12</sub>. (c)  
769 Superposition of the Ldt<sub>M12</sub>-T203 complex (green) with C354A catalytic mutant structure (PDB  
770 ID: 3TX4, blue). The red arrows indicate movements in YkuD flap upon T203 drug binding.  
771 (d) Residues that have undergone allosteric alterations upon T203 drug binding are shown  
772 with stick models. Ldt<sub>M12</sub>-T203 complex residues are represented in green and the C354A  
773 catalytic mutant in blue.

774 **Figure 7.** Cartoon model showing the mechanism of recognition of dual PG substrates and/or  
775 dual  $\beta$ -lactam drugs across the S-pocket and catalytic site of Ldt<sub>M12</sub>. A small red line in the  
776 figure indicates a covalent bond between donor and acceptor stem peptides of PG or  
777 covalent bond between C354 and  $\beta$ -lactam.

778  
779  
780  
781  
782

783 **TABLES**

784

785 **Table 1.** Data collection and refinement statistics

786

787

|                                         | <b>Ldt<sub>Mt2</sub>-Sugar</b>            | <b>Ldt<sub>Mt2</sub>-T203</b>             |
|-----------------------------------------|-------------------------------------------|-------------------------------------------|
| <b>Data Collection</b>                  |                                           |                                           |
| <b>Wavelength (Å)</b>                   | 1.0                                       | 1.0                                       |
| <b>Resolution (Å)</b>                   | 29.73 - 1.58 (1.64 - 1.58)                | 30.0-1.7 (1.73- 1.70)                     |
| <b>Space group</b>                      | P 1 21 1                                  | P 1 21 1                                  |
| <b>Unit cell (Å)</b>                    | 60.906, 93.981, 75.539,<br>90, 92.975, 90 | 60.799 94.278 75.707<br>90.00 93.14 90.00 |
| <b>Unique reflections<sup>a</sup></b>   | 111390                                    | 90418                                     |
| <b>Multiplicity<sup>a</sup></b>         | 4.3 (4.1)                                 | 5(5)                                      |
| <b>Completeness<sup>a</sup></b>         | 96.0 (98.6)                               | 97.4 (95.9)                               |
| <b>R<sub>merge</sub><sup>a, b</sup></b> | 0.048 (0.55)                              | 0.073 (0.74)                              |
| <b>Overall I/σ(I)<sup>a</sup></b>       | 20.37 (1.8)                               | 23.7(3.3)                                 |
| <b>Refinement</b>                       |                                           |                                           |
| <b>R<sub>work</sub> (%)<sup>c</sup></b> | 0.1662                                    | 0.1666                                    |
| <b>R<sub>free</sub> (%)<sup>d</sup></b> | 0.1980                                    | 0.1853                                    |
| <b>r.m.s.d.</b>                         |                                           |                                           |
| <b>Bonds (Å)</b>                        | 0.009                                     | 0.009                                     |
| <b>Angles (°)</b>                       | 1.03                                      | 1.033                                     |
| <b>Average B-factor (Å<sup>2</sup>)</b> |                                           |                                           |
| <b>Protein</b>                          | 14.9                                      | 14.2                                      |
| <b>Active site ligand</b>               | 19.28                                     | L01=25.71, T20= 34.1                      |
| <b>Ramachandaran</b>                    |                                           |                                           |
| <b>Favored</b>                          | 98.28 %                                   | 97.99 %                                   |
| <b>Additional allowed</b>               | 1.72 %                                    | 2.01 %                                    |
| <b>PDB ID:</b>                          | 7F71                                      | 7F8P                                      |

788

789

790

791

792

793

794

795

796

797

798

799

\*Values in parenthesis are for the highest-resolution shell

**Table 2.** Kinetic parameters of β-lactam hydrolysis by Ldt<sub>Mt2</sub> and mutant proteins



800  
801  
802  
803

| <b>Enzyme</b>                   | <b>V<sub>max</sub> (μM/min)</b> | <b>K<sub>m</sub> (μM)</b> | <b>K<sub>cat</sub> (sec<sup>-1</sup>)</b> | <b>K<sub>cat</sub>/K<sub>m</sub> (M<sup>-1</sup>sec<sup>-1</sup>)</b> |
|---------------------------------|---------------------------------|---------------------------|-------------------------------------------|-----------------------------------------------------------------------|
| <b>Ldt<sub>M12</sub> (ΔN55)</b> | 0.23 ±0.01                      | 16.32 ±1.78               | 7.7E-4                                    | 47.18                                                                 |
| <b>IgD1</b>                     | Ambiguous                       | -                         | -                                         | -                                                                     |
| <b>IgD2</b>                     | Ambiguous                       | -                         | -                                         | -                                                                     |
| <b>IgD1-IgD2</b>                | Ambiguous                       | -                         | -                                         | -                                                                     |
| <b>IgD2-YkuD</b>                | 0.21 ±0.01                      | 16.18 ±2.24               | 7.0E-4                                    | 43.26                                                                 |
| <b>YkuD</b>                     | 0.15 ±0.02                      | 129.5 ±41.80              | 5.0E-4                                    | 3.86                                                                  |
| <b>R209E</b>                    | 0.25 ±0.07                      | 428.40 ±195.9             | 8.3E-4                                    | 1.90                                                                  |
| <b>S351A</b>                    | 0.11 ±0.02                      | 123.1 ±56.7               | 3.7E-4                                    | 3.01                                                                  |
| <b>C354A</b>                    | Ambiguous                       | -                         | -                                         | -                                                                     |
| <b>H352A</b>                    | 0.10 ±0.01                      | 21.14 ±6.11               | 3.3E-4                                    | 15.61                                                                 |
| <b>H336A</b>                    | 0.07 ±0.01                      | 39.13 ±17.92              | 2.3E-4                                    | 5.88                                                                  |
| <b>M303A</b>                    | 0.14 ±0.01                      | 11.71 ±2.90               | 4.7E-4                                    | 40.14                                                                 |
| <b>S337A</b>                    | 0.23 ±0.01                      | 23.30 ±2.51               | 7.6E-4                                    | 32.62                                                                 |

804  
805  
806  
807  
808  
809  
810  
811  
812  
813  
814  
815  
816  
817  
818  
819  
820

821 **Table 3.** Binding energy of Ldt<sub>M12</sub> with  $\beta$ -lactam compounds in kcal·mol<sup>-1</sup> calculated by  
822 Autodock vina.

823  
824  
825  
826  
827  
828  
829

| <b>Drug</b>       | <b>Binding energy<br/>(kcal/mol)</b> |
|-------------------|--------------------------------------|
| <b>Ampicillin</b> | -7.1                                 |
| <b>Oxacillin</b>  | -8.3                                 |
| <b>Cefotaxime</b> | -7.8                                 |
| <b>Biapenem</b>   | -6.3                                 |
| <b>T203</b>       | -6.9                                 |

830  
831  
832  
  
833  
  
834  
835  
836  
837  
838  
839  
840  
841  
842  
843  
844  
845  
846  
847  
848  
849  
850

851

852

853

## 854 REFERENCES

855 Afonine, P.V., Grosse-Kunstleve, R.W., Echols, N., Headd, J.J., Moriarty, N.W.,  
856 Mustyakimov, M., Terwilliger, T.C., Urzhumtsev, A., Zwart, P.H., and Adams, P.D. (2012).  
857 Towards automated crystallographic structure refinement with phenix.refine. *Acta*  
858 *Crystallogr D Biol Crystallogr* *68*, 352-367.

859 Bianchet, M.A., Pan, Y.H., Basta, L.A.B., Saavedra, H., Lloyd, E.P., Kumar, P., Mattoo, R.,  
860 Townsend, C.A., and Lamichhane, G. (2017). Structural insight into the inactivation of  
861 *Mycobacterium tuberculosis* non-classical transpeptidase LdtMt2 by biapenem and  
862 tebipenem. *BMC Biochem* *18*, 8.

863 Brammer Basta, L.A., Ghosh, A., Pan, Y., Jakoncic, J., Lloyd, E.P., Townsend, C.A.,  
864 Lamichhane, G., and Bianchet, M.A. (2015). Loss of a Functionally and Structurally Distinct  
865 Id-Transpeptidase, LdtMt5, Compromises Cell Wall Integrity in *Mycobacterium tuberculosis*.  
866 *J Biol Chem* *290*, 25670-25685.

867 Chakaya, J., Khan, M., Ntoumi, F., Aklillu, E., Fatima, R., Mwaba, P., Kapata, N., Mfinanga,  
868 S., Hasnain, S.E., Katoto, P., *et al.* (2021). Global Tuberculosis Report 2020 - Reflections on  
869 the Global TB burden, treatment and prevention efforts. *Int J Infect Dis*.

870 Cordillot, M., Dubee, V., Triboulet, S., Dubost, L., Marie, A., Hugonnet, J.E., Arthur, M., and  
871 Mainardi, J.L. (2013). In vitro cross-linking of *Mycobacterium tuberculosis* peptidoglycan by  
872 L,D-transpeptidases and inactivation of these enzymes by carbapenems. *Antimicrob Agents*  
873 *Chemother* *57*, 5940-5945.

874 Correale, S., Ruggiero, A., Capparelli, R., Pedone, E., and Berisio, R. (2013). Structures of  
875 free and inhibited forms of the L,D-transpeptidase LdtMt1 from *Mycobacterium tuberculosis*.  
876 *Acta Crystallogr D Biol Crystallogr* *69*, 1697-1706.

877 Duan, Y., Wu, C., Chowdhury, S., Lee, M.C., Xiong, G., Zhang, W., Yang, R., Cieplak, P.,  
878 Luo, R., Lee, T., *et al.* (2003). A point-charge force field for molecular mechanics simulations  
879 of proteins based on condensed-phase quantum mechanical calculations. *J Comput Chem* *24*,  
880 1999-2012.

881 Dubee, V., Triboulet, S., Mainardi, J.L., Etheve-Quellejeu, M., Gutmann, L., Marie, A.,  
882 Dubost, L., Hugonnet, J.E., and Arthur, M. (2012). Inactivation of *Mycobacterium*  
883 *tuberculosis* l,d-transpeptidase LdtMt(1) by carbapenems and cephalosporins. *Antimicrob*  
884 *Agents Chemother* *56*, 4189-4195.

885 Edo, Z., Arthur, M., and Hugonnet, J.E. (2017). Reversible inactivation of a peptidoglycan  
886 transpeptidase by a beta-lactam antibiotic mediated by beta-lactam-ring recyclization in the  
887 enzyme active site. *Sci Rep* *7*, 9136.

888 Emsley, P., and Cowtan, K. (2004). Coot: model-building tools for molecular graphics. *Acta*  
889 *crystallographica Section D, Biological crystallography* *60*, 2126-2132.

890 Erdemli, S.B., Gupta, R., Bishai, W.R., Lamichhane, G., Amzel, L.M., and Bianchet, M.A.  
891 (2012). Targeting the cell wall of *Mycobacterium tuberculosis*: structure and mechanism of  
892 L,D-transpeptidase 2. *Structure* *20*, 2103-2115.

893 Fakhar, Z., Govender, T., Maguire, G.E.M., Lamichhane, G., Walker, R.C., Kruger, H.G., and  
894 Honarparvar, B. (2017). Differential flap dynamics in l,d-transpeptidase2 from  
895 *Mycobacterium tuberculosis* revealed by molecular dynamics. *Mol Biosyst* *13*, 1223-1234.

- 896 Fibriansah, G., Gliubich, F.I., and Thunnissen, A.M. (2012). On the mechanism of  
897 peptidoglycan binding and cleavage by the endo-specific lytic transglycosylase MltE from  
898 *Escherichia coli*. *Biochemistry* *51*, 9164-9177.
- 899 Gideon, H.P., and Flynn, J.L. (2011). Latent tuberculosis: what the host "sees"? *Immunol Res*  
900 *50*, 202-212.
- 901 Gupta, R., Lavollay, M., Mainardi, J.L., Arthur, M., Bishai, W.R., and Lamichhane, G.  
902 (2010). The *Mycobacterium tuberculosis* protein LdtMt2 is a nonclassical transpeptidase  
903 required for virulence and resistance to amoxicillin. *Nat Med* *16*, 466-469.
- 904 Hugonnet, J.E., Tremblay, L.W., Boshoff, H.I., Barry, C.E., 3rd, and Blanchard, J.S. (2009).  
905 Meropenem-clavulanate is effective against extensively drug-resistant *Mycobacterium*  
906 *tuberculosis*. *Science* *323*, 1215-1218.
- 907 Keren, I., Minami, S., Rubin, E., and Lewis, K. (2011). Characterization and transcriptome  
908 analysis of *Mycobacterium tuberculosis* persisters. *mBio* *2*, e00100-00111.
- 909 Kim, H.S., Kim, J., Im, H.N., Yoon, J.Y., An, D.R., Yoon, H.J., Kim, J.Y., Min, H.K., Kim,  
910 S.J., Lee, J.Y., *et al.* (2013). Structural basis for the inhibition of *Mycobacterium tuberculosis*  
911 L,D-transpeptidase by meropenem, a drug effective against extensively drug-resistant strains.  
912 *Acta Crystallogr D Biol Crystallogr* *69*, 420-431.
- 913 Kumar, P., Kaushik, A., Lloyd, E.P., Li, S.G., Mattoo, R., Ammerman, N.C., Bell, D.T.,  
914 Perryman, A.L., Zandi, T.A., Ekins, S., *et al.* (2017). Non-classical transpeptidases yield  
915 insight into new antibacterials. *Nat Chem Biol* *13*, 54-61.
- 916 Lavollay, M., Arthur, M., Fourgeaud, M., Dubost, L., Marie, A., Veziris, N., Blanot, D.,  
917 Gutmann, L., and Mainardi, J.L. (2008). The peptidoglycan of stationary-phase  
918 *Mycobacterium tuberculosis* predominantly contains cross-links generated by L,D-  
919 transpeptidation. *J Bacteriol* *190*, 4360-4366.
- 920 Li, W.J., Li, D.F., Hu, Y.L., Zhang, X.E., Bi, L.J., and Wang, D.C. (2013). Crystal structure  
921 of L,D-transpeptidase LdtMt2 in complex with meropenem reveals the mechanism of  
922 carbapenem against *Mycobacterium tuberculosis*. *Cell Res* *23*, 728-731.
- 923 Libreros-Zuniga, G.A., Dos Santos Silva, C., Salgado Ferreira, R., and Dias, M.V.B. (2019).  
924 Structural Basis for the Interaction and Processing of beta-Lactam Antibiotics by L,d-  
925 Transpeptidase 3 (LdtMt3) from *Mycobacterium tuberculosis*. *ACS Infect Dis* *5*, 260-271.
- 926 Liebschner, D., Afonine, P.V., Baker, M.L., Bunkoczi, G., Chen, V.B., Croll, T.I., Hintze, B.,  
927 Hung, L.W., Jain, S., McCoy, A.J., *et al.* (2019). Macromolecular structure determination  
928 using X-rays, neutrons and electrons: recent developments in Phenix. *Acta Crystallogr D*  
929 *Struct Biol* *75*, 861-877.
- 930 Lillebaek, T., Dirksen, A., Baess, I., Strunge, B., Thomsen, V.O., and Andersen, A.B. (2002).  
931 Molecular evidence of endogenous reactivation of *Mycobacterium tuberculosis* after 33 years  
932 of latent infection. *J Infect Dis* *185*, 401-404.
- 933 Mainardi, J.L., Fourgeaud, M., Hugonnet, J.E., Dubost, L., Brouard, J.P., Ouazzani, J., Rice,  
934 L.B., Gutmann, L., and Arthur, M. (2005). A novel peptidoglycan cross-linking enzyme for a  
935 beta-lactam-resistant transpeptidation pathway. *J Biol Chem* *280*, 38146-38152.
- 936 Martelli, G., Pessatti, T.B., Steiner, E.M., Cirillo, M., Caso, C., Bisognin, F., Landreh, M.,  
937 Monte, P.D., Giacomini, D., and Schnell, R. (2021). N-Thio-beta-lactams targeting L,D-  
938 transpeptidase-2, with activity against drug-resistant strains of *Mycobacterium tuberculosis*.  
939 *Cell Chem Biol*.
- 940 Mavrici, D., Prigozhin, D.M., and Alber, T. (2014). *Mycobacterium tuberculosis* RpfE crystal  
941 structure reveals a positively charged catalytic cleft. *Protein Sci* *23*, 481-487.

942 Minor, W., Cymborowski, M., Otwinowski, Z., and Chruszcz, M. (2006). HKL-3000: the  
943 integration of data reduction and structure solution--from diffraction images to an initial  
944 model in minutes. *Acta crystallographica Section D, Biological crystallography* 62, 859-866.  
945 Mitkowski, P., Jagielska, E., Nowak, E., Bujnicki, J.M., Stefaniak, F., Niedzialek, D.,  
946 Bochtler, M., and Sabala, I. (2019). Structural bases of peptidoglycan recognition by  
947 lysostaphin SH3b domain. *Sci Rep* 9, 5965.  
948 Otero, L.H., Rojas-Altuve, A., Llarrull, L.I., Carrasco-Lopez, C., Kumarasiri, M., Lastochkin,  
949 E., Fishovitz, J., Dawley, M., Heseck, D., Lee, M., *et al.* (2013). How allosteric control of  
950 *Staphylococcus aureus* penicillin binding protein 2a enables methicillin resistance and  
951 physiological function. *Proc Natl Acad Sci U S A* 110, 16808-16813.  
952 Peddireddy, V., Doddam, S.N., and Ahmed, N. (2017). Mycobacterial Dormancy Systems  
953 and Host Responses in Tuberculosis. *Front Immunol* 8, 84.  
954 Sanders, A.N., Wright, L.F., and Pavelka, M.S. (2014). Genetic characterization of  
955 mycobacterial L,D-transpeptidases. *Microbiology (Reading)* 160, 1795-1806.  
956 Schanda, P., Triboulet, S., Laguri, C., Bougault, C.M., Ayala, I., Callon, M., Arthur, M., and  
957 Simorre, J.P. (2014). Atomic model of a cell-wall cross-linking enzyme in complex with an  
958 intact bacterial peptidoglycan. *J Am Chem Soc* 136, 17852-17860.  
959 Schoonmaker, M.K., Bishai, W.R., and Lamichhane, G. (2014). Nonclassical transpeptidases  
960 of *Mycobacterium tuberculosis* alter cell size, morphology, the cytosolic matrix, protein  
961 localization, virulence, and resistance to beta-lactams. *J Bacteriol* 196, 1394-1402.  
962 Steiner, E.M., Schneider, G., and Schnell, R. (2017). Binding and processing of beta-lactam  
963 antibiotics by the transpeptidase LdtMt2 from *Mycobacterium tuberculosis*. *FEBS J* 284, 725-  
964 741.  
965 Tolufashe, G.F., Sabe, V.T., Ibeji, C.U., Ntombela, T., Govender, T., Maguire, G.E.M.,  
966 Kruger, H.G., Lamichhane, G., and Honarparvar, B. (2020). Structure and Function of L,D-  
967 and D,D-Transpeptidase Family Enzymes from *Mycobacterium tuberculosis*. *Curr Med Chem*  
968 27, 3250-3267.  
969 Trott, O., and Olson, A.J. (2010). AutoDock Vina: improving the speed and accuracy of  
970 docking with a new scoring function, efficient optimization, and multithreading. *J Comput*  
971 *Chem* 31, 455-461.  
972 Wayne, L.G., and Hayes, L.G. (1996). An in vitro model for sequential study of shutdown of  
973 *Mycobacterium tuberculosis* through two stages of nonreplicating persistence. *Infect Immun*  
974 64, 2062-2069.  
975 Wietzerbin, J., Das, B.C., Petit, J.F., Lederer, E., Leyh-Bouille, M., and Ghuyssen, J.M. (1974).  
976 Occurrence of D-alanyl-(D)-meso-diaminopimelic acid and meso-diaminopimelyl-meso-  
977 diaminopimelic acid interpeptide linkages in the peptidoglycan of *Mycobacteria*.  
978 *Biochemistry* 13, 3471-3476.  
979 Williams, C.J., Headd, J.J., Moriarty, N.W., Prisant, M.G., Videau, L.L., Deis, L.N., Verma,  
980 V., Keedy, D.A., Hintze, B.J., Chen, V.B., *et al.* (2018). MolProbity: More and better  
981 reference data for improved all-atom structure validation. *Protein Sci* 27, 293-315.  
982 Zandi, T.A., and Townsend, C.A. (2021). Competing off-loading mechanisms of meropenem  
983 from an l,d-transpeptidase reduce antibiotic effectiveness. *Proc Natl Acad Sci U S A* 118.  
984 Zhang, Y., Yew, W.W., and Barer, M.R. (2012). Targeting persisters for tuberculosis control.  
985 *Antimicrob Agents Chemother* 56, 2223-2230.  
986  
987

988 **FIGURES**

989

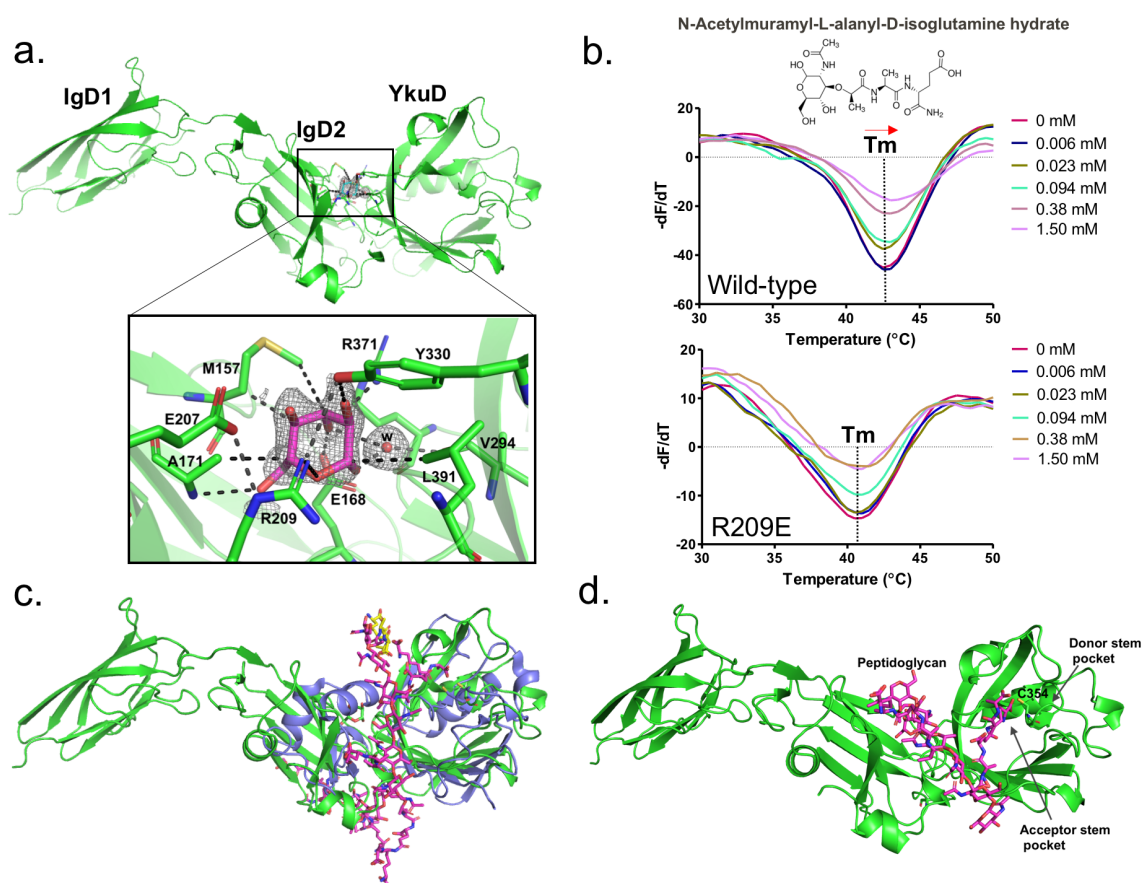

990

991 **Fig 1. Binding studies of peptidoglycan with Ldt<sub>M12</sub>.** (a) Crystal structure of Ldt<sub>M12</sub> in complex with  
992 one glucose molecule. The inset shows the 2Fo-Fc omit map (contoured at 1.0σ) of glucose (cyan  
993 colour) modelled into the S-pocket of Ldt<sub>M12</sub> in the crystal structure. (b) ThermoFluor assay for binding  
994 studies with the PG-precursor N-Acetylmuramyl-L-alanyl-D-isoglutamine hydrate with wild type Ldt<sub>M12</sub>  
995 and the R209E mutant. The dotted line indicates the T<sub>m</sub>, and a red arrow indicates the direction of  
996 thermal shift. Assays were performed in biological triplicates, and graphs were plotted by fitting the  
997 data on Sigmoidal dose-response (variable slope) equation in GraphPad Prism software. (c)  
998 Superposition of Ldt<sub>M12</sub> (green) with PG-bound Ldt<sub>Bs</sub>, the *Bacillus subtilis* L,D-transpeptidase (PDB ID:  
999 2MTZ) (blue). (d) Modelling of peptidoglycan (pink color) into the Ldt<sub>M12</sub> crystal structure (green).

1000

1001

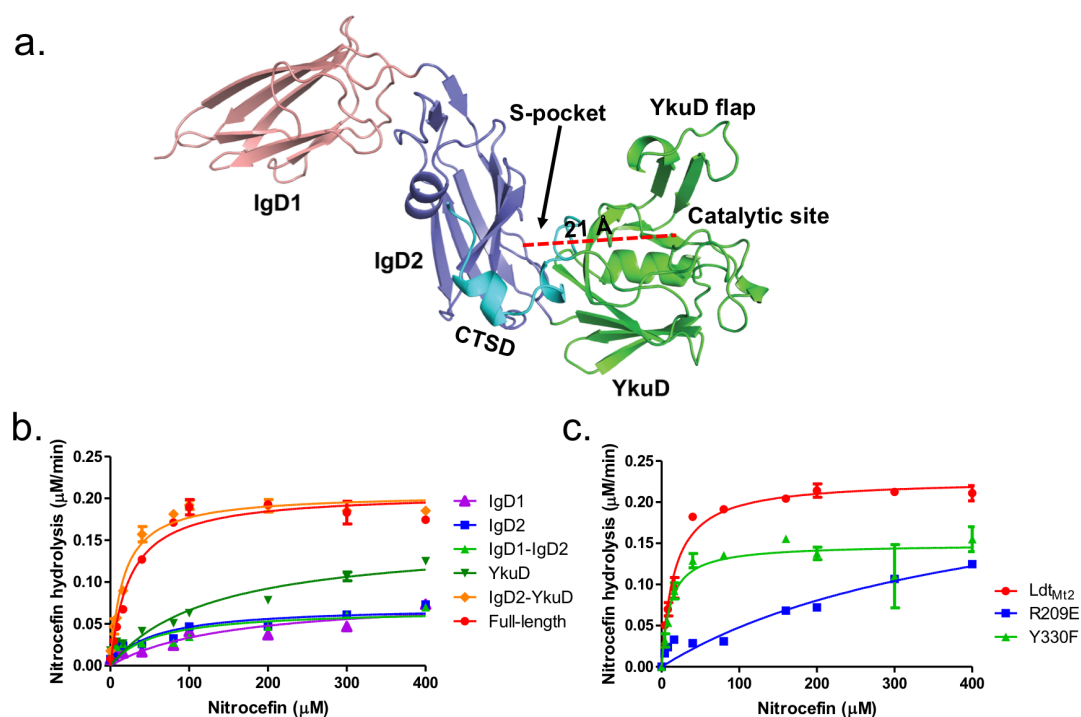

1002

1003 **Fig 2. Role of the S-pocket in  $\beta$ -lactam hydrolysis.** (a) The structure of Ldt<sub>M12</sub> with each domain  
1004 highlighted: IgD1 (orange), IgD2 (blue), YkuD domain (green) and CTSD domain (cyan). A red dotted  
1005 line demarcates the 21 Å distance between the S-pocket and the catalytic site. (b) Chromogenic  
1006 nitrocefin hydrolysis activity of truncated Ldt<sub>M12</sub> fragments corresponding to the IgD1, IgD2, IgD1-IgD2,  
1007 YkuD, and IgD2-YkuD domains. (c) Chromogenic nitrocefin hydrolysis activity of wild-type Ldt<sub>M12</sub>,  
1008 R209E, and Y330F mutants. Nitrocefin hydrolysis assays were performed in experimental duplicates  
1009 and graphs were plotted in GraphPad Prism software by fitting the data on nonlinear regression  
1010 curves using the Michaelis-Menten equation.

1011

1012

1013

1014

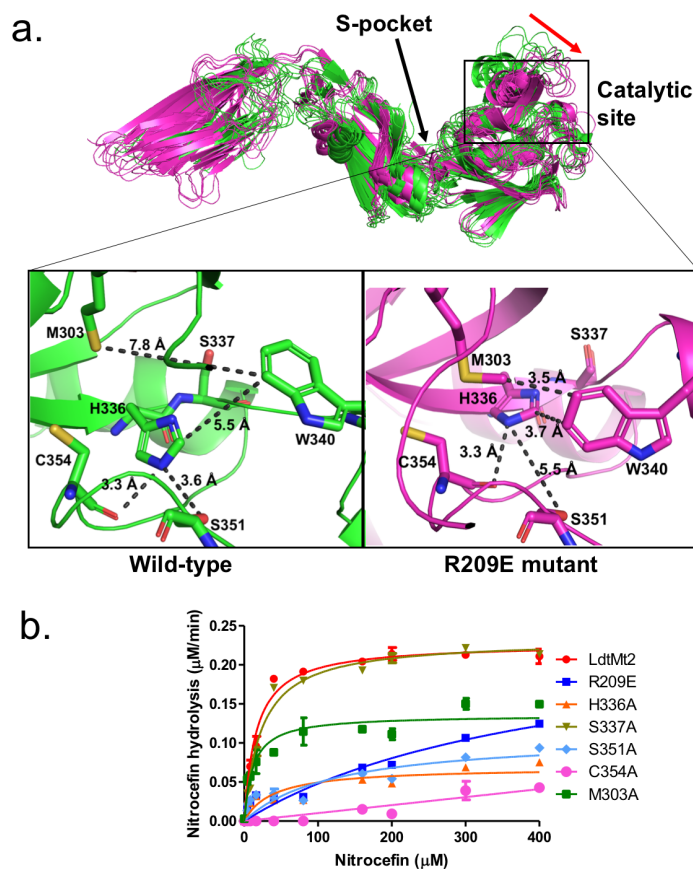

1015

1016 **Fig 3. S-pocket crosstalk with the catalytic site of Ldt<sub>M12</sub>** (a) Molecular dynamic (MD) simulation of  
1017 wild-type Ldt<sub>M12</sub> (green) and the R209E mutant (pink). A red arrow indicates a shift in YkuD flap in  
1018 R209E mutant during 100 ns of MD. The inset shows a detailed view of the catalytic site of the wild-  
1019 type protein and R209E mutant after 75 ns of MD simulations. (b) Chromogenic nitrocefin hydrolysis  
1020 activity of wild-type Ldt<sub>M12</sub> and different mutants with alterations in both the S-pocket and catalytic site.  
1021 Nitrocefin hydrolysis assays were performed in experimental duplicates and graphs were plotted in  
1022 GraphPad Prism by fitting the data on nonlinear regression curves with the Michaelis-Menten  
1023 equation.

1024

1025

1026

1027



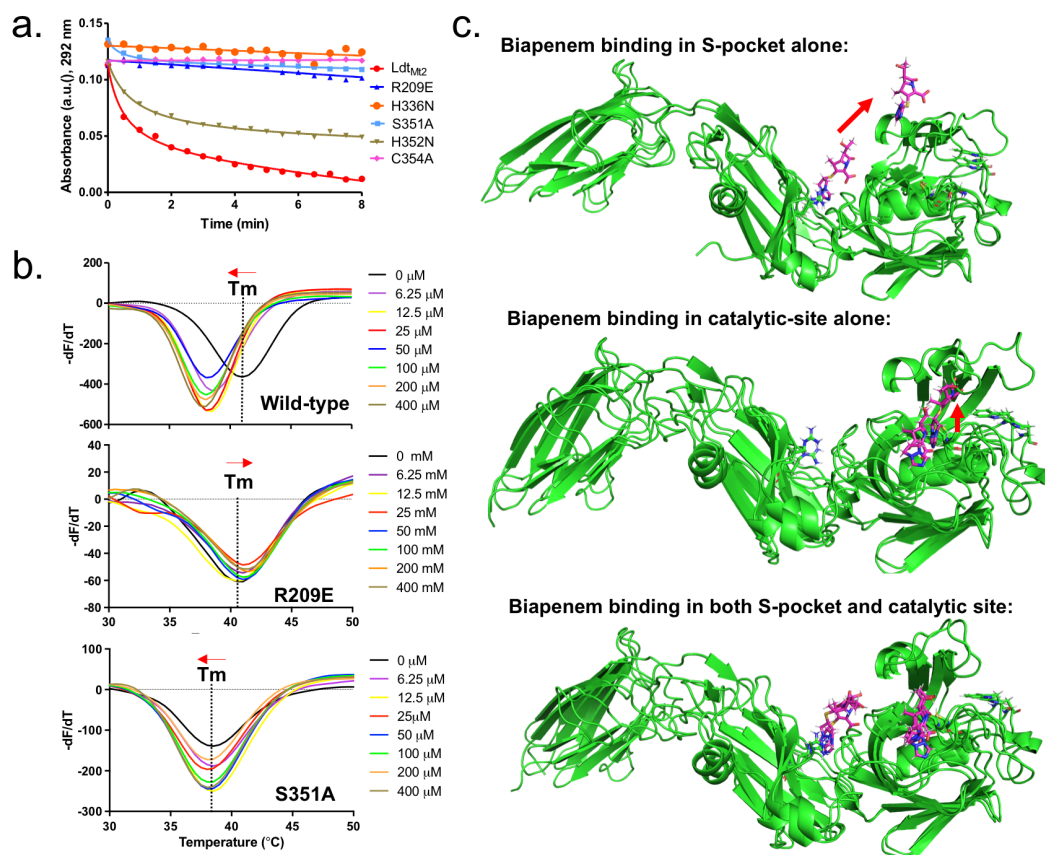

1028

1029 **Fig 4. Role of the S-pocket and catalytic site in recognizing biapenem.** (a) Acylation activity of  
1030 biapenem with Ldt<sub>M12</sub> and mutants was monitored at 292nm wavelength using UV-Visible  
1031 spectrophotometry. Maximum absorbance spectra of biapenem was found at 292 nm that was used  
1032 to monitor decrease in biapenem concentration upon acylation with the Ldt<sub>M12</sub>. The experiment  
1033 was performed in biological triplicates to calculate the average values and standard deviations .  
1034 Graphs were plotted in GraphPad Prism by fitting the data on a nonlinear regression curve with one-phase  
1035 decay. (b) ThermoFluor assays for binding of biapenem with Ldt<sub>M12</sub> and the R209E and S351  
1036 mutants. (c) Molecular dynamic simulations of Ldt<sub>M12</sub> in complex with biapenem. Ldt<sub>M12</sub> is  
1037 represented in green and biapenem in pink. The red arrow indicates the movement of biapenem to a  
1038 second position revealed by the MD simulations.

1039

1040

1041

1042

1043

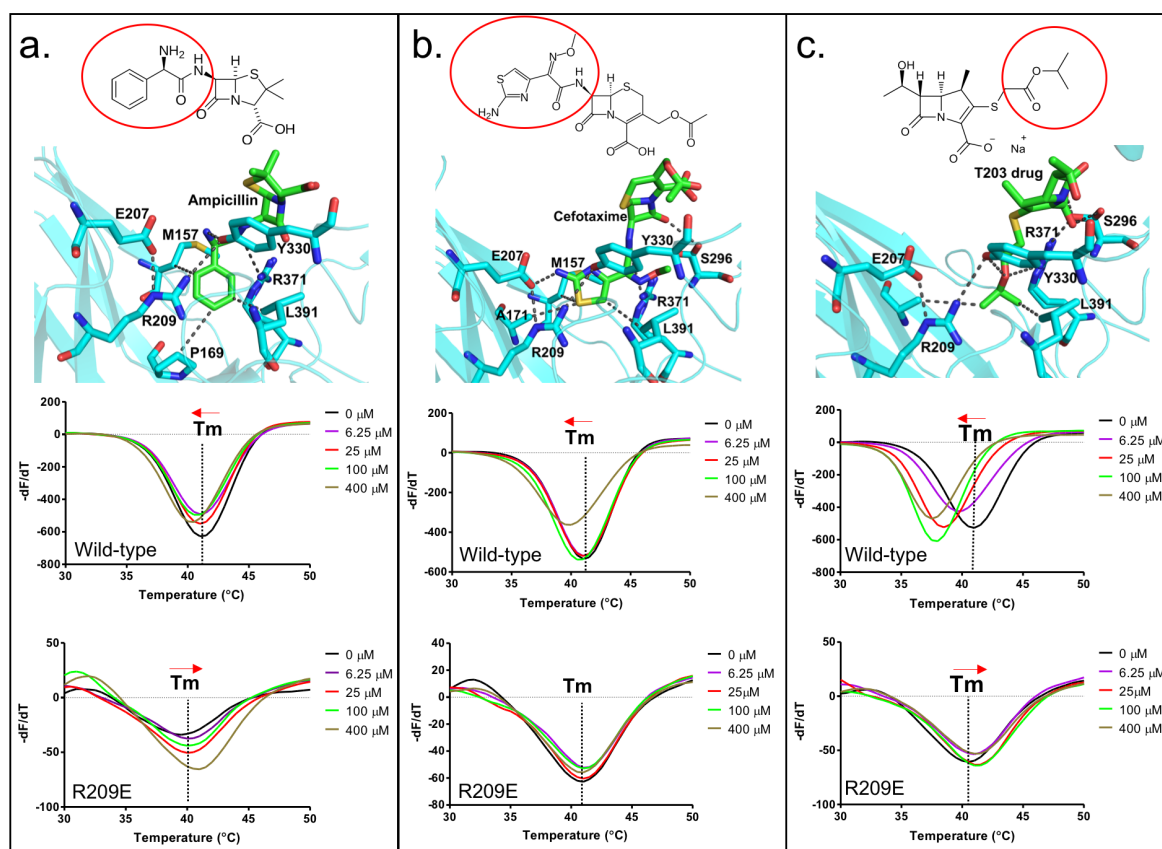

1044

1045 **Fig 5. Binding of various classes of  $\beta$ -lactams to the S-pocket.** (a) Top: ampicillin (stick model in  
1046 green) bound to the S-pocket (cyan) of Ldt<sub>M12</sub> through its R1 group side-chain, 2-amino-2-phenylacetyl  
1047 (red oval). Bottom: ThermoFluor assays for binding studies of ampicillin with wild-type Ldt<sub>M12</sub> and the  
1048 R209E mutant. (b) Top: cefotaxime (stick model in green) bound to the S-pocket (cyan) of Ldt<sub>M12</sub>  
1049 through its R1 group side-chain, thiazol-4-yl (red oval). Bottom: ThermoFluor assays for binding studies  
1050 of cefotaxime with wild-type Ldt<sub>M12</sub> and the R209E mutant. (c) Top: the experimental carbapenem drug  
1051 T203 (stick model in green) bound to the S-pocket (cyan) of Ldt<sub>M12</sub> through its R3 group side-chain, 2-  
1052 isopropoxy-2-oxoethyl (red circle). Bottom: ThermoFluor assays for binding studies of T203 drug with  
1053 wild-type Ldt<sub>M12</sub> and the R209E mutant.

1054

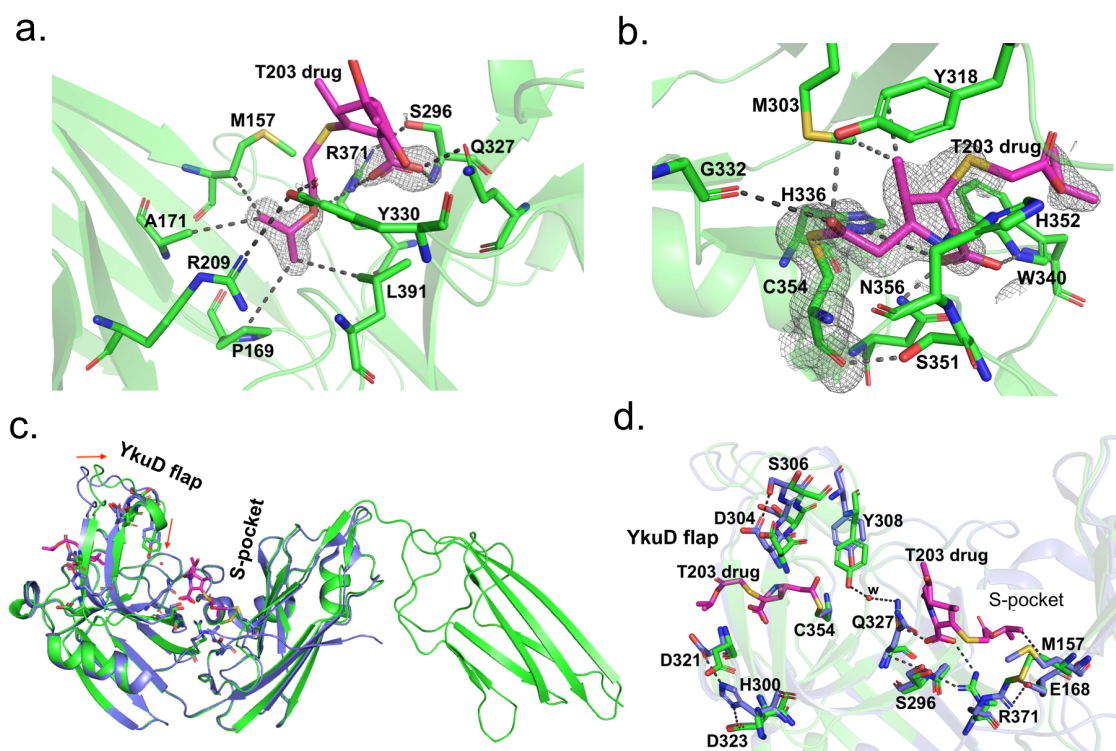

1055

1056 **Fig 6. Structural studies of Ldt<sub>M12</sub> with the experimental T203 carbapenem drug and allosteric**  
1057 **conformation analyses.** (a) The 2Fo-Fc map (contoured at 1.0 $\sigma$ ) of the T203-R3 group side chain,  
1058 2-isopropoxy-2-oxoethyl (pink), modelled in the S-pocket of Ldt<sub>M12</sub> in the crystal structure. (b) The 2Fo-  
1059 Fc omit map (contoured at 1.0 $\sigma$ ) of the full T203 structure (pink) modelled in the catalytic-site of Ldt<sub>M12</sub>  
1060 where it acylates the C354 residue of Ldt<sub>M12</sub>. (c) Superposition of the Ldt<sub>M12</sub>-T203 complex (green) with  
1061 C354A catalytic mutant structure (PDB ID: 3TX4, blue). The red arrows indicate movements in YkuD  
1062 flap upon T203 drug binding. (d) Residues that have undergone allosteric alterations upon T203 drug  
1063 binding are shown with stick models. Ldt<sub>M12</sub>-T203 complex residues are represented in green and the  
1064 C354A catalytic mutant in blue.

1065

1066

1067

1068

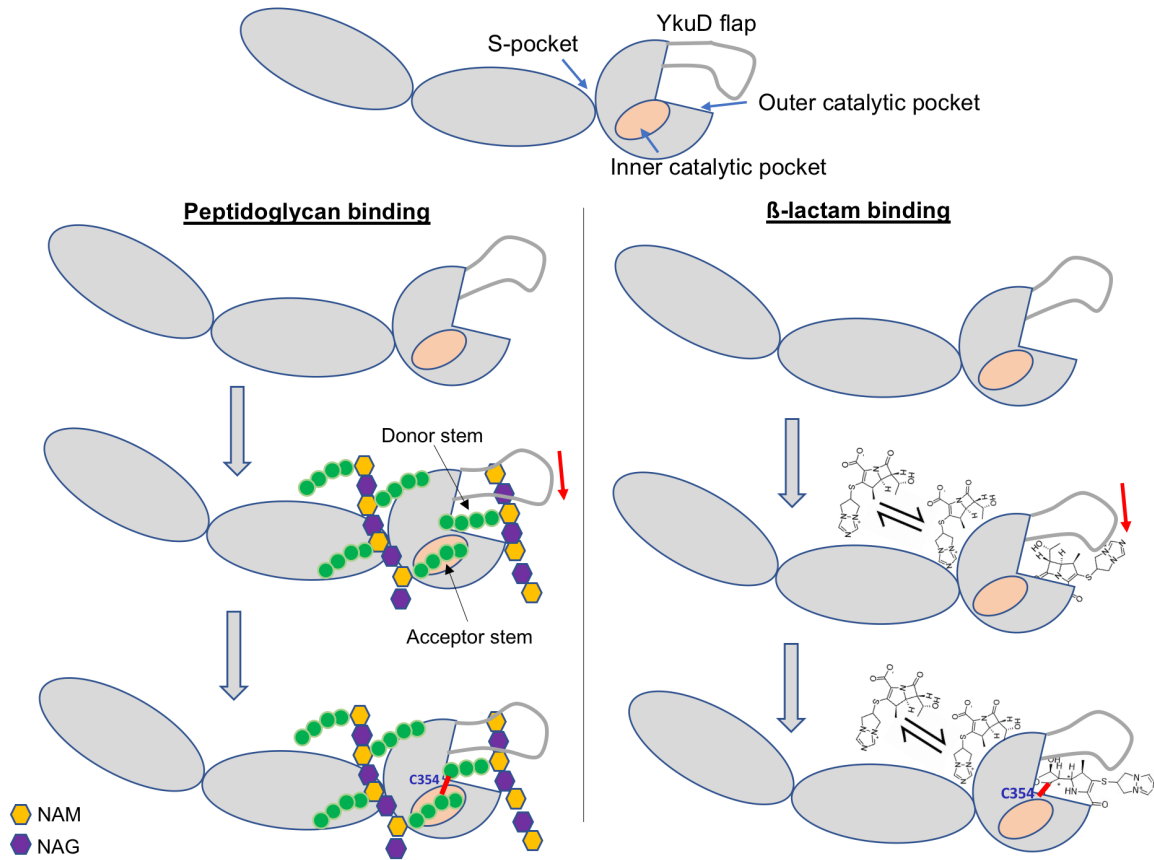

1069

1070

1071

1072

1073

1074

1075

1076

1077

1078

1079

1080

1081

1082

1083

1084

1085

**Fig 7.** Cartoon model showing the mechanism of recognition of dual PG substrates and/or dual  $\beta$ -lactam drugs across the S-pocket and catalytic site of Ldt<sub>M12</sub>. A small red line in the figure indicates a covalent bond between donor and acceptor stem peptides of PG or a covalent bond between C354 and  $\beta$ -lactam.

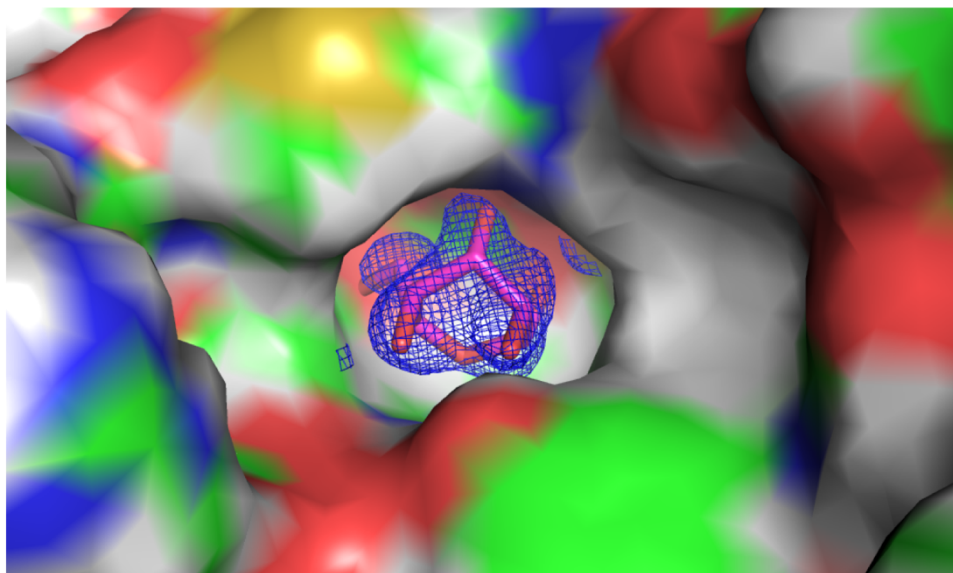

**Figure S1:** 2Fo-Fc map of sugar bound into the S-pocket of Ldt<sub>M12</sub> in the crystal structure. S-pocket is represented in surface. Sugar is shown in stick model in pink color. 2Fo-Fc map is shown in blue color.

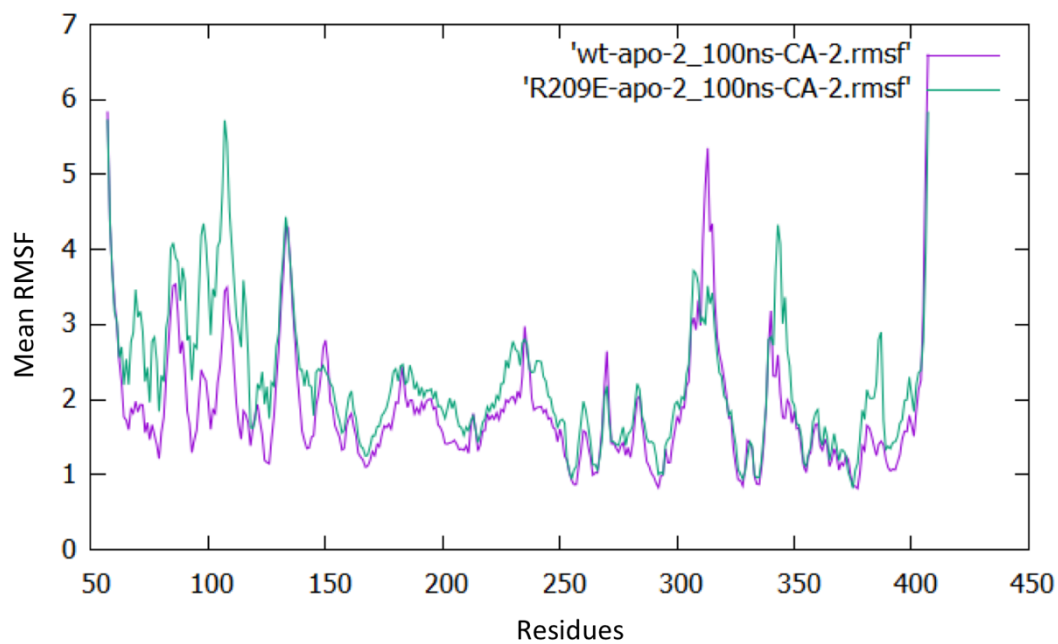

**Figure S2:** RMSF graph of wild-type Ldt<sub>M12</sub> (purple) and R209 mutant (green) after 100ns of MD simulations.

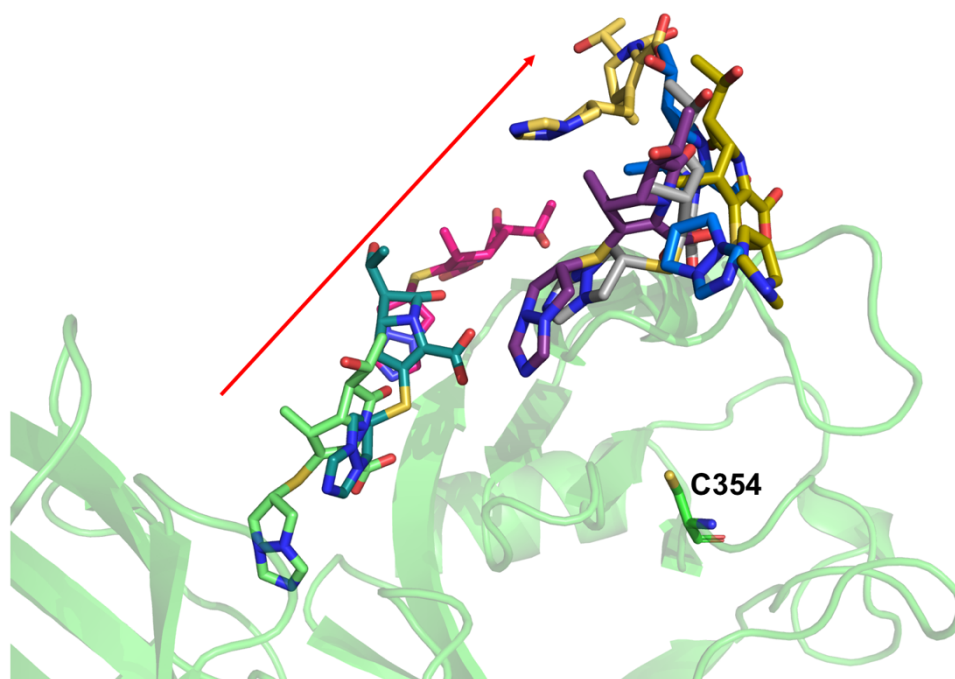

**Figure S3:** Molecular dynamic trajectory of biapenem bound in S-pocket alone. A red arrow indicates the direction of movement of biapenem during an overall 75 ns of MD simulation. Ldt<sub>M12</sub> is represented in cartoon in green colour and biapenem in various trajectories is represented in stick model.

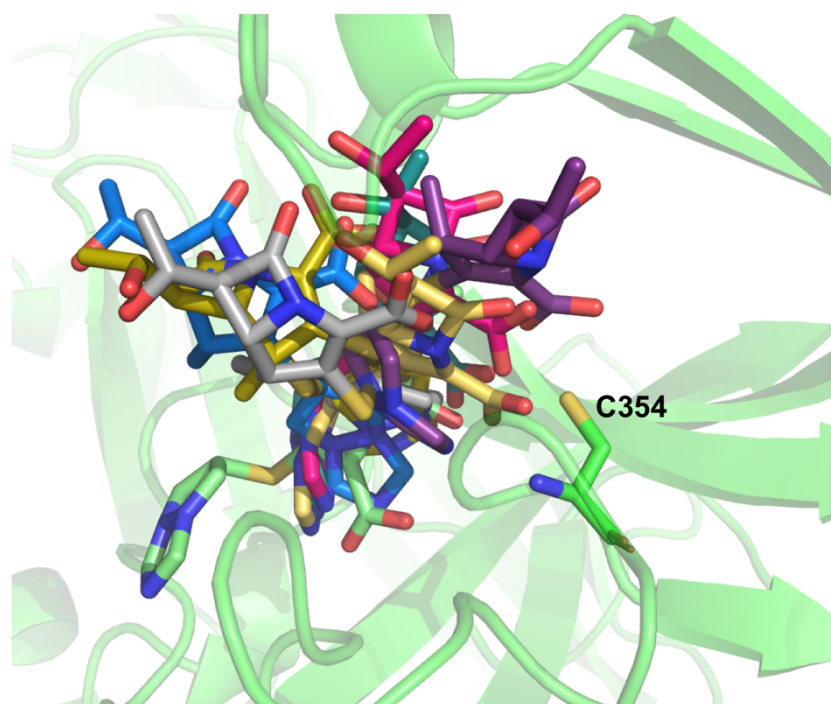

**Figure S4:** Molecular dynamic trajectory of biapenem bound in catalytic site alone in Ldt<sub>M12</sub>. Ldt<sub>M12</sub> is represented in cartoon in green colour and biapenem in various trajectories is represented in stick model.



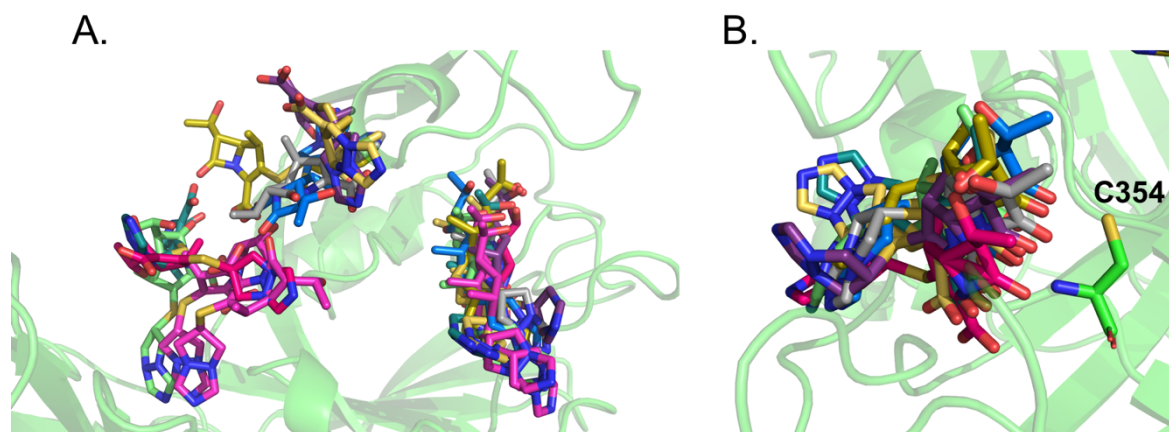

**Figure S5:** Molecular dynamic trajectory of dual biapenem bound together in both S-pocket and catalytic site. (A) Snapshots of biapenem from both S-pocket and catalytic site (B) Snapshots of biapenem from catalytic site. Ldt<sub>M12</sub> is represented in cartoon in green colour and biapenem in various trajectories is represented in stick model.

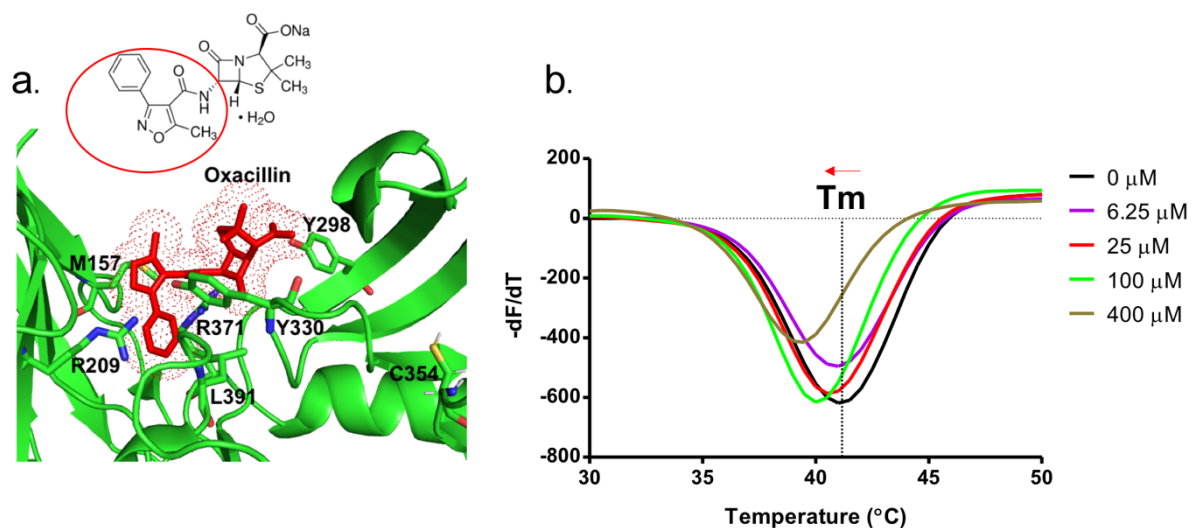

**Figure S6:** (a) Oxacillin (stick model, red colour) bound into the S-pocket (green colour) of Ldt<sub>M12</sub> through R1 group side chain 5-methyl-3-phenyl-1,2-oxazole-4-carbonyl). 5-methyl-3-phenyl-1,2-oxazole-4-carbonyl group is highlighted with red circle in the chemical structure of oxacillin. Picture in the bottom shows ThermoFluor assays for binding studies of oxacillin with wild-type Ldt<sub>M12</sub>.

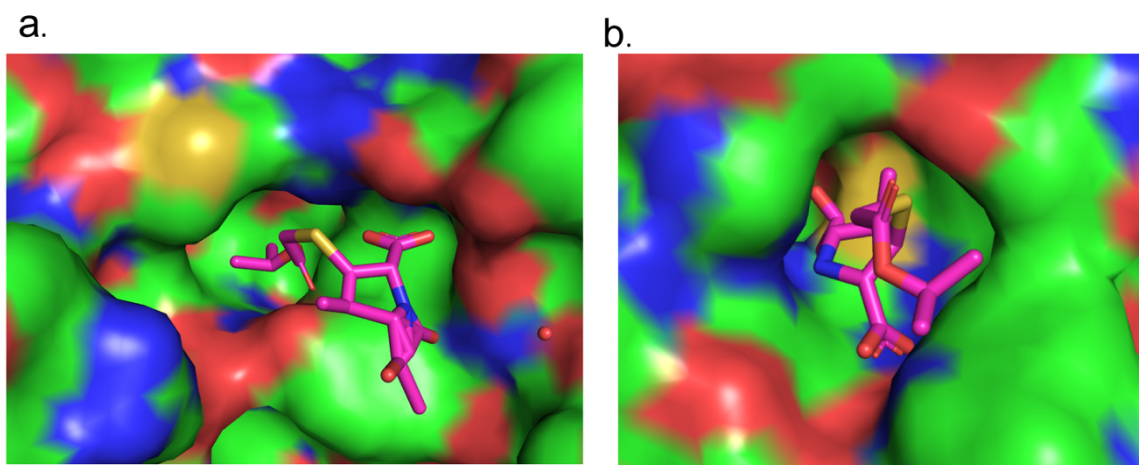

**Figure S7:** (A) T203 drug bound into the S-pocket of Ldt<sub>M12</sub> in the crystal structure. (B) T203 drug bound into the catalytic site of Ldt<sub>M12</sub> in the crystal structure. Ldt<sub>M12</sub> is represented in surface and T203 drug is represented in stick model with pink color.

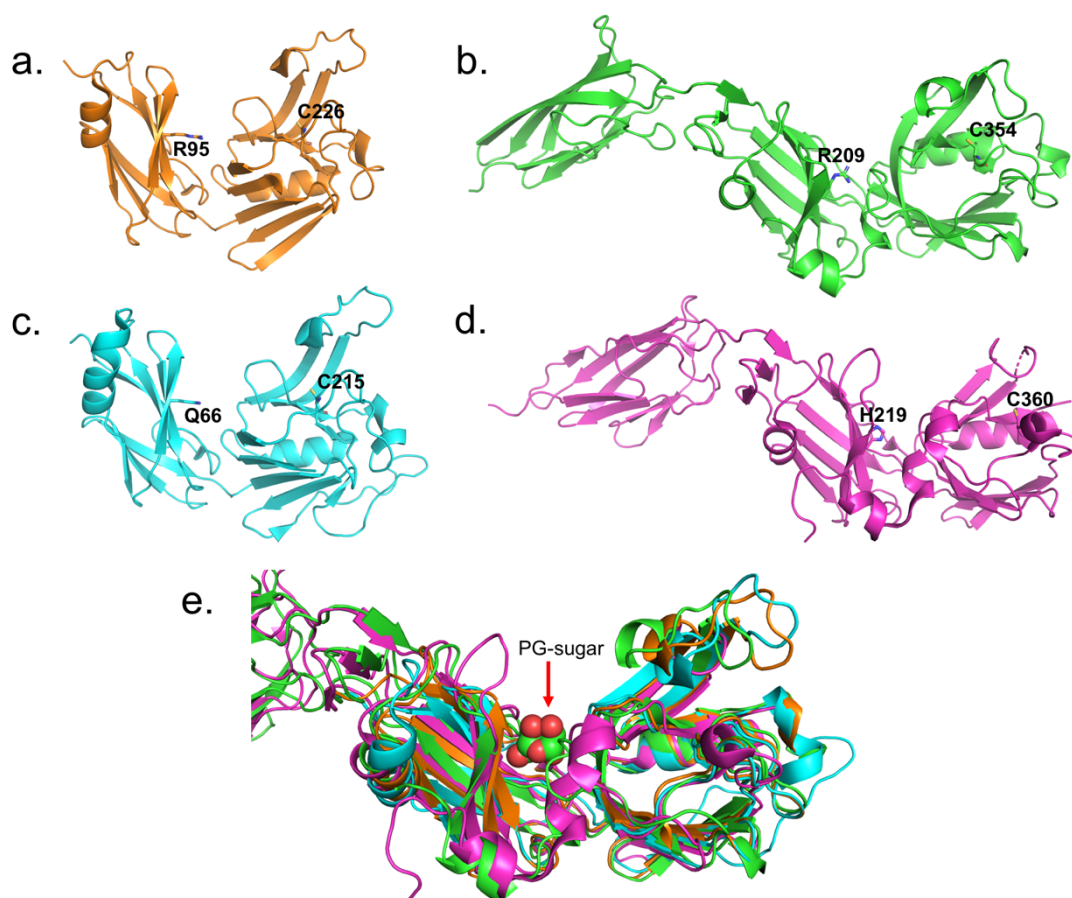

**Figure S8.** (A-D) Crystal structures of various LDTs, Ldt<sub>M1</sub> (PDB ID: 4JMN; orange color), Ldt<sub>M2</sub> (PDB ID: 7F71; green color), Ldt<sub>M3</sub> (PDB ID: 6D4K; cyan color) and Ldt<sub>M15</sub> (PDB ID: 6D5A; pink color). Highlighted residues in the crystal structures belong to S-pocket and catalytic site. (E) Superposition of various LDTs. PG sugar moiety bound across the S-pocket is shown in sphere model.
